# Supplementary material for: Prediction of cold chain loading environment for agricultural products based on K-medoids-LSTM-XGBoost ensemble model
Source: PeerJ Comput Sci. 2024 Dec 23;10:e2510. doi: 10.7717/peerj-cs.2510 (PMC11784797; doi:10.7717/peerj-cs.2510)
Supplement: Supplemental Information 10 [file peerj-cs-10-2510-s010.xlsx]

## Sheet: Sheet1
Number (1 Min per)	Temperature 1, current room temperature+23	Temperature 2, current room temperature+23	Temperature 3, current room temperature+23	Temperature 4, current room temperature+23	Temperature 1, current room temperature+26	Temperature 2, current room temperature+26	Temperature 3, current room temperature+26	Temperature 4, current room temperature+26	A set of application data for verification, temperature 1, current room temperature+28
1	-18.5	-18.8	-18.5	-18.6	-18.3	-19	-19.2	-18.8	-19.8
2	-18.3	-18.3	-18.1	-18.2	-18.3	-19	-19	-19	-19.3
3	-18.5	-18.5	-18.2	-18.5	-18.5	-18.8	-18.8	-18.8	-19.2
4	-18.2	-18.3	-17.9	-18.1	-18.3	-18.6	-18.8	-18.6	-19.4
5	-18.1	-18	-17.9	-18.2	-18	-18.4	-18.6	-18	-18.8
6	-18	-17.7	-17.8	-17.9	-17.7	-18	-18.1	-17.8	-18.5
7	-17.5	-17.5	-17.3	-17.5	-17.5	-17.7	-17.6	-17.5	-18.1
8	-17.1	-16.9	-16.6	-16.8	-16.9	-17.4	-17.3	-17.2	-17.7
9	-16.7	-16.3	-16.2	-16.4	-16.3	-16	-15.9	-15.8	-17.2
10	-16.3	-16.1	-15.9	-16.1	-16.1	-15.7	-15.6	-15.5	-17.1
11	-15.8	-15.5	-15.2	-15.4	-15.5	-15.3	-15.2	-15.1	-17.1
12	-15.3	-14.9	-14.5	-14.7	-14.9	-14.6	-14.5	-14.4	-16.2
13	-14.5	-14	-13.7	-13.9	-14	-13.6	-13.5	-13.4	-16.2
14	-14	-13.7	-13.6	-13.8	-13.7	-13.4	-13.3	-13.2	-15.7
15	-13.8	-13.1	-12.9	-13.5	-13.1	-12.7	-12.6	-12.5	-14.8
16	-12.3	-12.9	-12.8	-13	-12.9	-12.7	-12.6	-12.5	-13.9
17	-11.7	-11.9	-11.7	-11.9	-11.9	-11.6	-11.5	-11.4	-13.1
18	-11.2	-11.5	-11.2	-11.4	-11.3	-10.9	-10.7	-10.7	-13.1
19	-11.5	-11.1	-11	-11.2	-11.1	-10.8	-10.7	-10.6	-12.4
20	-10.8	-10.7	-10.5	-10.7	-10.9	-10.5	-10.3	-10.3	-12.3
21	-11.7	-10.3	-10	-10.2	-10	-9.8	-9.7	-9.6	-11.5
22	-11.8	-9.9	-9.5	-9.7	-9.5	-9.2	-9	-9	-10.6
23	-12.4	-10.2	-9.9	-10.1	-9.7	-9.3	-9.2	-9.1	-10.5
24	-12.9	-10.3	-10.2	-10.4	-9.9	-9.6	-9.4	-9.4	-10.2
25	-13.4	-10.5	-10.3	-10.5	-10	-9.6	-9.3	-9.4	-9.5
26	-13.5	-10.7	-10.6	-10.8	-10.1	-9.9	-9.5	-9.7	-8.6
27	-13.9	-10.9	-10.7	-10.9	-10.2	-9.9	-9.5	-9.7	-7.4
28	-14	-11.1	-10.8	-11	-10.3	-9.9	-9.5	-9.7	-6.7
29	-14.2	-11.6	-11.5	-11.7	-11.5	-11.2	-10.8	-10.8	-6.2
30	-14.4	-12.1	-11.9	-12.1	-11.9	-11.5	-11.1	-11.1	-4.9
31	-15	-12.8	-12.5	-12.7	-12.3	-12.1	-11.7	-11.7	-4
32	-15.3	-13.5	-13.1	-13.3	-12.7	-12.4	-12	-12	-3.2
33	-15.6	-14.2	-13.9	-14.1	-13.1	-12.7	-12.3	-12.3	-2.7
34	-15.9	-14.6	-14.5	-14.7	-13.5	-13.2	-12.8	-12.8	-3.9
35	-17	-15.1	-14.9	-15.1	-13.9	-13.5	-13.1	-13.1	-2.4
36	-17.5	-15.6	-15.5	-15.7	-14.3	-14.1	-13.7	-13.7	-1.3
37	-17.7	-16.1	-15.9	-16.1	-14.7	-14.4	-14	-14	0.1
38	-17.9	-16.6	-16.3	-16.5	-15.1	-14.7	-14.3	-14.3	1
39	-17.9	-16.8	-16.4	-16.6	-15.5	-15.2	-14.8	-14.8	2.2
40	-18.5	-17	-16.7	-16.9	-15.9	-15.5	-15.1	-15.1	2.8
41	-18.6	-17.2	-17.1	-17.3	-16.3	-16.1	-15.7	-15.7	3.7
42	-18.7	-17.4	-17.2	-17.4	-16.7	-16.4	-16	-16	4.5
43	-19.2	-18	-17.7	-17.9	-17	-16.6	-16.2	-16.4	6.2
44	-19.4	-18.4	-18.3	-18.5	-17.3	-17	-16.6	-16.8	8.6
45	-19.6	-18.8	-18.6	-18.8	-17.6	-17.2	-16.8	-17	9.5
46	-20	-19	-18.7	-18.9	-18.2	-18	-17.9	-17.8	10.7
47	-20.1	-19.2	-18.8	-19	-18.3	-18	-17.9	-17.8	12.1
48	-20	-19.4	-19.1	-19.3	-18.4	-18	-17.9	-17.8	13
49	-20.2	-19.7	-19.6	-19.8	-18.5	-18.2	-18.1	-18	14
50	-20.1	-19.8	-19.6	-19.8	-18.8	-18.4	-18.3	-18.2	14.8
51	-20.1	-19.8	-19.7	-19.9	-19.1	-18.9	-18.8	-18.7	15.4
52	-19.5	-20	-19.8	-20	-19.2	-18.9	-18.8	-18.7	15.8
53	-19.2	-20.1	-19.8	-20	-19.5	-19.1	-19	-18.9	16.1
54	-18.9	-20.3	-20.2	-20.4	-19.7	-19.4	-19.3	-19.2	16.7
55	-18.1	-20	-19.8	-20	-20.1	-19.7	-19.6	-19.5	17.1
56	-17.2	-19.8	-19.5	-19.7	-20	-19.7	-19.6	-19.4	17.4
57	-17	-19.2	-18.8	-19	-20	-19.6	-19.5	-19.2	17.8
58	-16.5	-18.6	-18.3	-18.5	-20	-19.6	-19.4	-19.1	18.2
59	-16	-18	-17.9	-18.1	-20.2	-20	-19.9	-19.4	18.1
60	-15.5	-17.4	-17.2	-17.4	-20.1	-19.8	-19.6	-19.1	18.6
61	-15.1	-16.8	-16.7	-16.9	-19.8	-19.4	-19.3	-18.6	19.3
62	-14.3	-16.2	-16	-16.2	-19.7	-19.4	-19.2	-18.5	20.1
63	-12.6	-15.6	-15.3	-15.5	-19.9	-19.5	-19.4	-18.5	20
64	-12	-15	-14.9	-15.1	-20.1	-19.9	-19.7	-18.8	20.5
65	-11.6	-14.4	-14.2	-14.4	-19.7	-19.4	-19.1	-18.2	20.9
66	-11.3	-14	-13.7	-13.9	-19.3	-18.9	-18.5	-17.6	21.2
67	-11	-13.6	-13.2	-13.4	-19.6	-19.3	-18.9	-19	21.1
68	-10.5	-13.5	-13.2	-13.4	-19.1	-18.7	-18.3	-18.3	21
69	-10.1	-13.4	-13.3	-13.5	-18.9	-18.7	-18.3	-18.2	21.5
70	-9.8	-13	-12.8	-13	-18.6	-18.3	-17.9	-17.7	22
71	-9.5	-12.6	-12.5	-12.7	-18.3	-17.9	-17.5	-17	22.9
72	-9.3	-12	-11.8	-12	-17.7	-17.4	-17	-16.4	23.1
73	-9.3	-11.5	-11.2	-11.4	-17.5	-17.1	-16.7	-16	23.4
74	-9.4	-11.3	-10.9	-11.1	-17.4	-17.2	-16.8	-16	23.6
75	-9.3	-11	-10.7	-10.9	-16.6	-16.3	-15.9	-15	24.6
76	-9.7	-10.9	-10.8	-11	-16.3	-15.9	-15.5	-14.5	24.9
77	-10.2	-10.6	-10.4	-10.6	-15.9	-15.6	-15.2	-14.1	25.4
78	-10.7	-10.8	-10.5	-10.7	-15.1	-14.7	-14.3	-13.3	25.5
79	-11	-11.4	-11.3	-11.5	-14.3	-14	-13.6	-12.7	25.7
80	-11.1	-12	-11.8	-12	-13.6	-13.2	-12.8	-12	25.8
81	-11.2	-12.6	-12.3	-12.5	-13.7	-13.3	-12.9	-12.2	25.9
82	-11.5	-13.4	-13	-13.2	-12.9	-12.7	-12.3	-11.9	26.1
83	-11.6	-14.3	-14	-14.2	-12.7	-12.4	-12	-11.7	26.3
84	-12	-14.9	-14.8	-15	-11.8	-11.4	-11	-10.7	26.7
85	-12.3	-15.5	-15.3	-15.5	-11	-10.7	-10.3	-10	27
86	-12.6	-16.4	-16.3	-16.5	-10.6	-10.2	-9.8	-9.5	27.5
87	-12.9	-17	-16.8	-17	-10.4	-10.2	-9.8	-9.5	27.6
88	-13.5	-17.6	-17.3	-17.5	-9.8	-9.5	-9.1	-8.7	27.7
89	-14.1	-18.2	-18.1	-18.3	-9	-8.6	-8.2	-7.8	27.6
90	-14.3	-19	-18.8	-19	-7.9	-7.6	-7.3	-6.8	27.8
91	-15.2	-19.9	-19.6	-19.8	-7.3	-6.9	-6.6	-6.1	27.8
92	-16.1	-19.9	-19.5	-19.7	-6.7	-6.5	-6.2	-5.7	27.9
93	-16.4	-20	-19.7	-19.9	-5.3	-5	-4.7	-4.2	27.8
94	-16.5	-20	-19.9	-20.1	-4.3	-3.9	-3.6	-3.1	27.7
95	-17.1	-19.7	-19.5	-19.7	-3.6	-3.3	-3	-2.5	27.9
96	-17.3	-19.2	-19.1	-19.3	-2.8	-2.4	-2.1	-1.6	27.5
97	-17.5	-19.6	-19.4	-19.6	-4.1	-3.9	-3.6	-3.1	27.3
98	-17.7	-19.2	-18.9	-19.1	-2.7	-2.4	-2.1	-1.7	27.2
99	-17.9	-18.8	-18.7	-18.9	-1.7	-1.3	-1	-0.6	26.8
100	-18.3	-18.6	-18.4	-18.6	-0.4	-0.1	0.2	0.7	26.4
101	-18.7	-18.4	-18.1	-18.3	0.4	0.8	1.1	1.6	26
102	-19.1	-17.9	-17.5	-17.7	1.7	2	2.3	2.8	25.6
103	-19.2	-17.6	-17.3	-17.5	2.4	2.8	3.1	3.6	25.2
104	-19.3	-17.3	-17.2	-17.4	3.4	3.8	4.1	4.6	25
105	-19.4	-16.6	-16.4	-16.6	4.1	4.3	4.6	5.1	24.5
106	-19.3	-16.2	-16.1	-16.3	6.1	6.4	6.7	7.2	24
107	-19.3	-15.9	-15.7	-15.9	8.4	8.8	9.1	9.6	23.6
108	-19.5	-15.2	-14.9	-15.1	9.2	9.5	9.8	10.4	23.3
109	-19.8	-14.5	-14.1	-14.3	10.3	10.7	11	11.5	23
110	-19.9	-13.7	-13.4	-13.6	11.6	11.8	12.1	12.6	22.8
111	-19.9	-13.6	-13.5	-13.7	12.4	12.7	13	13.5	22
112	-20.3	-12.9	-12.7	-12.9	13.5	13.9	14.2	14.7	21.3
113	-20.2	-12.8	-12.5	-12.7	14.4	14.7	15	15.5	21.1
114	-19	-11.7	-11.6	-11.8	15.1	15.5	15.8	16.3	20.3
115	-19.2	-11	-10.8	-11	15.4	15.6	15.9	16.4	20
116	-18.5	-10.7	-10.4	-10.6	16	16.3	16.6	17.1	19.6
117	-18.2	-10.6	-10.2	-10.4	16.5	16.9	17.2	17.7	19.2
118	-18.1	-9.9	-9.6	-9.8	16.8	17.1	17.4	17.9	18.5
119	-18	-8.9	-8.8	-9	17	17.4	17.7	18.2	18
120	-17.5	-7.9	-7.7	-7.9	17.3	17.5	17.8	18.3	17
121	-17.1	-7.2	-7.1	-7.3	17.6	17.9	18.2	18.7	16.6
122	-16.7	-6.7	-6.5	-6.7	17.6	18	18.3	18.8	16.2
123	-16.3	-5.4	-5.1	-5.3	18.2	18.5	18.8	19.3	15.8
124	-15.8	-4.2	-4.1	-4.3	19	19.4	19.7	20.2	15
125	-15.3	-3.6	-3.4	-3.6	19.7	20	20.3	20.8	14.2
126	-14.5	-2.9	-2.6	-2.8	19.5	19.9	20.3	20.8	13.4
127	-14	-4.3	-3.9	-4.1	19.9	20	20.1	20.6	12.8
128	-13.8	-2.8	-2.5	-2.7	20.4	20.6	20.8	21.3	12.2
129	-12	-1.6	-1.5	-1.7	20.8	20.9	21	21.5	11.6
130	-11.7	-0.4	-0.2	-0.4	20.8	21	21.2	21.7	11
131	-11	0.5	0.6	0.4	20.6	20.7	20.8	21.5	10.4
132	-10.5	1.7	1.9	1.7	21.4	21.6	21.8	22.5	9.8
133	-10	2.3	2.6	2.4	21.8	21.9	22	22.9	9.2
134	-9.3	3.5	3.6	3.4	22.3	22.5	22.7	23.6	9
135	-9	4.1	4.3	4.1	22.8	22.9	23	24.1	8.5
136	-8.2	6	6.3	6.1	23.3	23.5	23.7	24.8	8
137	-7	8.2	8.6	8.4	23.8	23.9	24	25.3	7.5
138	-5.8	9.1	9.4	9.2	24.3	24.5	24.7	26	7
139	-4.6	10.4	10.5	10.3	24.8	24.9	25	26.5	6.5
140	-3.4	11.6	11.8	11.6	25.3	25.5	25.7	27.2	5.3
141	-2.2	12.5	12.6	12.4	25.2	25.5	25.8	27.3	4.1
142	-2.1	13.5	13.7	13.5	25.3	25.7	26.1	27.6	2.9
143	-1.9	14.3	14.6	14.4	25.1	25.6	26.1	27.6	2.2
144	-1.2	14.9	15.3	15.1	25.3	25.9	26.5	27	1.5
145	-0.5	15.3	15.6	15.4	24.9	25.6	25.7	26.2	0.8
146	-0.1	16.1	16.2	16	24.8	25	25.1	25.6	0.3
147	0.3	16.5	16.7	16.5	24.7	24.8	24.9	25.4	0
148	1	16.7	17	16.8	24.5	24.6	24.7	25.2	-0.3
149	2	17.1	17.2	17	24	24.1	24.2	24.7	-0.6
150	2.4	17.3	17.5	17.3	23.5	23.7	23.8	24.3	-0.9
151	2.9	17.5	17.8	17.6	23.2	23.3	23.4	23.5	-1.5
152	3.6	17.5	17.8	17.6	23.1	23.3	23.4	23.6	-2.1
153	4.3	18.3	18.4	18.2	22.8	22.9	23	23.3	-2.7
154	5	19	19.2	19	22.5	22.7	22.8	23.2	-3
155	6	19.6	19.9	19.7	22.2	22.3	22.4	22.9	-3.6
156	6.3	19.6	19.7	19.5	22	22.2	22.3	22.9	-4.2
157	6.6	19.9	20.1	19.9	21.6	21.7	21.9	22.6	-4.8
158	7	20.3	20.6	20.4	21.3	21.5	21.6	22.4	-5.7
159	7.7	20.6	21	20.8	21.1	21.2	21.4	22.3	-6.6
160	8.2	20.7	21	20.8	20.7	20.9	21	22	-7.2
161	8.7	20.7	20.8	20.6	19.9	20	20.2	21.3	-7.8
162	9.2	21.4	21.6	21.4	19.5	19.7	19.8	19.9	-8.4
163	9.7	21.9	22	21.8	19.1	19.2	19.4	19.6	-9
164	10.2	22.6	22.8	22.6	18.5	18.7	19	19.3	-9.9
165	10.7	23.3	23.6	23.4	17.9	18	18.4	18.8	-10.8
166	11	23.7	23.8	23.6	17.3	17.5	17.9	18.5	-11.4
167	13	23.9	24.1	23.9	16.7	17	17.4	18.2	-12
168	15.6	23.8	24.1	23.9	16.2	16.6	17	17.7	-12.6
169	15	23.7	24.1	23.9	16	16.5	16.9	17.7	-13.5
170	15.3	23.9	24.2	24	15.8	16.4	16.8	17.7	-14.1
171	15.6	23.6	23.7	23.5	15.2	15.9	16.3	17.3	-14.6
172	15.9	23.5	23.7	23.5	14.6	14.8	15.2	16.3	-15.5
173	16	23.4	23.5	23.3	13.5	13.6	14	15	-16.5
174	16.5	23.5	23.7	23.5	13.5	13.6	14	14.9	-17.2
175	17.2	23.6	23.9	23.7	13	13.1	13.5	14	-17.7
176	17.9	22.2	22.3	22.1	13	13.2	13.6	14.1	-18.4
177	18.6	22.1	22.3	22.1	12.6	12.7	13.1	13.6	-18.5
178	18.8	21.8	22.1	21.9	12	12.2	12.6	13.1	-18.8
179	19	20.2	20.6	20.4	12.4	12.5	12.9	13.5	-18.9
180	19.6	19.7	20	19.8	12.1	12.3	12.7	13.4	-19.1
181	19.7	19.1	19.2	19	11.5	11.6	12	12.1	-19.3
182	20	18.8	19	18.8	11.5	11.7	12.1	12.3	-19.3
183	20.3	18.3	18.4	18.2	11.3	11.4	11.8	12.1	-19.5
184	20.2	18	18.2	18	11.1	11.3	11.7	12.1	-19.4
185	20.6	17.7	18	17.8	10.9	11	11.4	11.9	-19
186	21	17.7	18.1	17.9	10.5	10.7	11.1	11.7	-18.8
187	21.4	17.5	17.8	17.6	10	10.1	10.5	11.2	-19.3
188	23	16.8	16.9	16.7	9.9	10.1	10.5	11.3	-18.6
189	24.1	16.7	16.9	16.7	9.1	9.2	9.5	10.4	-18.2
190	25	17.3	17.6	17.4	8.5	8.7	9	10	-17.7
191	25.3	17.1	17.2	17	7.7	7.9	8.2	9.3	-17.2
192	25.2	16.9	17.1	16.9	7.1	7.2	7.5	7.6	-16.6
193	25	16.4	16.7	16.5	6.3	6.5	6.8	7	-16.6
194	25.5	16.2	16.6	16.4	5.7	5.8	6.1	6.4	-16.7
195	25.5	15.8	16.1	15.9	4.9	5.1	5.4	5.8	-15.9
196	25.4	15.1	15.2	15	4.3	4.4	4.7	5.2	-15.8
197	25.2	15.2	15.4	15.2	3.5	3.7	4	4.6	-15.6
198	25.3	14.6	14.7	14.5	2.9	3	3.3	4	-14.6
199	25.4	13.2	13.4	13.2	2.6	2.8	3.1	3.9	-13.6
200	25.5	13.8	14.1	13.9	2	2.1	2.4	3.3	-12.7
201	25.5	13.7	13.8	13.6	1.1	1.3	1.6	2.6	-12.6
202	25.3	13.5	13.7	13.5	0.4	0.5	0.8	1.9	-11.8
203	23.6	13.3	13.6	13.4	-1.1	-0.9	-0.6	0.4	-11.8
204	23.3	12.4	12.8	12.6	-1.9	-1.8	-1.5	-0.6	-11.1
205	23	12.7	13	12.8	-2.9	-2.7	-2.4	-1.6	-10.3
206	22.1	12.2	12.3	12.1	-3.4	-3.3	-3	-2.3	-10.1
207	21.6	11.7	11.9	11.7	-4.1	-3.9	-3.6	-3	-10.1
208	21.1	11.6	11.7	11.5	-4.6	-4.5	-4.2	-3.7	-9.3
209	21	11.4	11.6	11.4	-5.3	-5.1	-4.8	-4.3	-8.3
210	20.7	11.2	11.5	11.3	-6.1	-6	-5.7	-5.2	-7
211	20.2	10.9	11	10.8	-7.1	-6.9	-6.6	-6.5	-6.2
212	19.8	10.5	10.7	10.5	-7.6	-7.5	-7.2	-7	-5.6
213	19.4	10.2	10.5	10.3	-8.3	-8.1	-7.8	-7.5	-4.4
214	19	10.1	10.5	10.3	-8.8	-8.7	-8.4	-8	-3.6
215	18.6	9.3	9.6	9.4	-9.5	-9.3	-9	-8.5	-2.9
216	18.2	8.4	8.5	8.3	-10.3	-10.2	-9.9	-9.3	-2.3
217	17.8	7.8	8	7.8	-11.3	-11.1	-10.8	-10.1	-3.8
218	17.4	7	7.1	6.9	-11.8	-11.7	-11.4	-10.6	-2.2
219	17.3	6.4	6.6	6.4	-12.5	-12.3	-12	-11.1	-1
220	17.2	5.8	6.1	5.9	-13	-12.9	-12.6	-11.6	0.5
221	17.1	5.2	5.6	5.4	-14	-13.8	-13.5	-12.4	1.5
222	17	4.4	4.7	4.5	-14.5	-14.4	-14.1	-14	2.8
223	16.9	3.5	3.6	3.4	-15.1	-14.9	-14.6	-14.4	3.3
224	17	2.9	3.1	2.9	-15.9	-15.8	-15.5	-15.2	4.1
225	16.7	2.8	3.1	2.9	-16.9	-16.7	-16.5	-16.1	4.8
226	16.1	1.9	2	1.8	-17.4	-17.3	-17.2	-16.7	6.6
227	15.8	1.2	1.4	1.2	-18.1	-17.9	-17.7	-17.1	8.7
228	15.5	0.5	0.8	0.6	-18.6	-18.5	-18.4	-17.7	9.7
229	15	-0.8	-0.4	-0.6	-18.9	-18.7	-18.5	-17.7	11
230	14.8	-1.8	-1.5	-1.7	-19	-18.9	-18.8	-17.9	12.5
231	14.5	-2.9	-2.8	-3	-19.3	-19.1	-18.9	-17.9	13.5
232	13	-3.4	-3.2	-3.4	-19.3	-19.2	-19.1	-18	14.6
233	13.5	-4.1	-4	-4.2	-19.7	-19.5	-19.3	-18.3	15.3
234	13.6	-4.6	-4.4	-4.6	-19.5	-19.4	-19.3	-18.4	15.8
235	13.3	-5.1	-4.8	-5	-19.9	-19.7	-19.5	-18.7	16.1
236	13	-6.2	-6.1	-6.3	-19.6	-19.5	-19.4	-19.3	16.5
237	12	-7	-6.8	-7	-19.8	-19.6	-19.4	-19.2	16.8
238	12.4	-7.5	-7.2	-7.4	-19.7	-19.6	-19.5	-19.2	17.3
239	12.1	-8	-7.6	-7.8	-19.8	-19.6	-19.5	-19.1	17.7
240	11.5	-8.7	-8.4	-8.6	-19.8	-19.7	-19.6	-19.1	18.2
241	11.5	-9.5	-9.4	-9.6	-19.7	-19.5	-19.4	-18.8	18.7
242	11.2	-10.3	-10.1	-10.3	-19.3	-19.2	-19.1	-18.4	18.7
243	10.9	-11.3	-11.2	-11.4	-19.1	-18.9	-18.8	-18	19.1
244	10.8	-11.8	-11.6	-11.8	-18.7	-18.6	-18.5	-17.6	19.7
245	10.3	-12.3	-12	-12.2	-18.4	-18.2	-18.1	-17.1	20.4
246	9.9	-13.1	-13	-13.2	-17.9	-17.8	-17.7	-16.6	20.4
247	9.7	-13.9	-13.7	-13.9	-17.6	-17.4	-17.3	-17.2	20.6
248	9	-14.4	-14.1	-14.3	-17.3	-17.2	-17.1	-16.9	21.1
249	8.3	-14.8	-14.4	-14.6	-16.7	-16.5	-16.4	-16.1	21.5
250	7.6	-15.8	-15.5	-15.7	-15.8	-15.7	-15.6	-15.2	21.5
251	6.9	-16.9	-16.8	-17	-15.5	-15.3	-15.1	-14.6	21.5
252	6.2	-17.4	-17.2	-17.4	-14.9	-14.8	-14.7	-14.1	22.1
253	5.5	-18.1	-18	-18.2	-14.5	-14.3	-14.1	-13.4	22.5
254	4.8	-18.6	-18.4	-18.6	-13.6	-13.5	-13.4	-12.6	23.3
255	4.1	-18.7	-18.4	-18.6	-13.5	-13.3	-13.1	-12.2	23.4
256	3.4	-18.8	-18.4	-18.6	-12.6	-12.5	-12.4	-11.4	23.8
257	2.7	-19.1	-18.8	-19	-12.3	-12.1	-11.9	-10.8	23.7
258	2	-19.4	-19.3	-19.5	-11.3	-11.2	-10.9	-9.9	24.8
259	1	-19.6	-19.4	-19.6	-10.9	-10.7	-10.3	-9.4	25.2
260	0.3	-19.4	-19.1	-19.3	-10.7	-10.6	-10.2	-9.4	25.8
261	-0.4	-19.9	-19.8	-20	-10.7	-10.5	-10.1	-9.4	26
262	-1.1	-19.6	-19.4	-19.6	-9.5	-9.4	-9	-8.4	26.3
263	-1.8	-19.6	-19.3	-19.5	-8.5	-8.3	-7.9	-7.4	26.3
264	-2.5	-19.5	-19.1	-19.3	-7.6	-7.5	-7.1	-6.6	26.3
265	-3.2	-19.6	-19.3	-19.5	-6.9	-6.7	-6.3	-6.2	26.4
266	-3.9	-19.9	-19.8	-20	-6.5	-6.4	-6	-5.8	26.7
267	-4.6	-19.6	-19.4	-19.6	-5.2	-5	-4.6	-4.3	26.8
268	-5.3	-19.4	-19.3	-19.5	-4.1	-4	-3.6	-3.2	27.2
269	-6	-19	-18.8	-19	-3.7	-3.5	-3.1	-2.6	27.8
270	-6.7	-18.6	-18.3	-18.5	-2.5	-2.4	-2	-1.4	28
271	-7.4	-18.4	-18.3	-18.5	-3.9	-3.7	-3.3	-2.6	28.2
272	-8.1	-17.9	-17.7	-17.9	-2.3	-2.2	-1.8	-1	28.2
273	-8.8	-17.4	-17.1	-17.3	-1.4	-1.2	-0.8	0.1	28.3
274	-9.5	-17.1	-16.7	-16.9	-0.3	-0.2	0.2	1.2	28.2
275	-10.2	-16.5	-16.2	-16.4	0.6	0.8	1.2	2.3	28.2
276	-10.9	-15.9	-15.8	-16	2	2.1	2.5	2.6	28.2
277	-11.6	-15.4	-15.2	-15.4	2.6	2.8	3.2	3.4	28.2
278	-12.3	-15	-14.9	-15.1	3.7	3.8	4.2	4.5	28.5
279	-13	-14.4	-14.2	-14.4	4.2	4.4	4.8	5.2	28
280	-13.7	-13.5	-13.2	-13.4	6.3	6.4	6.8	7.3	27.7
281	-14.4	-13.5	-13.4	-13.6	8.2	8.4	8.8	9.4	27.5
282	-15.1	-12.6	-12.4	-12.6	9.5	9.6	10	10.7	27.2
283	-15.8	-12.1	-11.8	-12	10.8	11	11.3	12.1	26.5
284	-16.5	-11.1	-10.7	-10.9	11.9	12	12.3	13.2	26.2
285	-17.2	-10.7	-10.4	-10.6	12.1	12.3	12.6	13.6	25.9
286	-17.9	-10.8	-10.7	-10.9	12.3	12.4	12.7	13.8	25.3
287	-18.6	-10.6	-10.4	-10.6	12.6	12.8	13.1	14.1	25.2
288	-19.3	-9.6	-9.5	-9.7	13.4	13.5	13.8	14.7	24.8
289	-20	-8.4	-8.2	-8.4	14	14.2	14.5	15.3	24.4
290	-20.1	-7.5	-7.2	-7.4	14.2	14.3	14.6	15.3	24.1
291	-20.1	-6.6	-6.2	-6.4	14.6	14.8	15.1	15.7	23.9
292	-20.2	-6.4	-6.1	-6.3	15.2	15.3	15.6	16.1	23.5
293	-20	-5.2	-5.1	-5.3	15.4	15.6	15.9	16.4	23.2
294	-19.3	-4.1	-3.9	-4.1	15.8	15.9	16.2	16.3	22.3
295	-19.8	-3.5	-3.2	-3.4	16	16.2	16.5	16.7	21.7
296	-19.5	-2.6	-2.5	-2.7	17.2	17.3	17.6	17.9	21.2
297	-19.2	-3.8	-3.6	-3.8	17.9	18.1	18.4	18.8	20.5
298	-18.9	-2.2	-1.9	-2.1	18.4	18.5	18.8	19.3	20.3
299	-18.5	-1.1	-0.7	-0.9	18.7	18.9	19.2	19.8	20
300	-18.1	-0.2	0.1	-0.1	19.1	19.2	19.5	20.2	19.7
301	-17.7	0.6	0.7	0.5	19.2	19.4	19.7	20.5	19.1
302	-17.5	2	2.2	2	19.5	19.6	19.9	20.8	18.5
303	-16.9	2.6	2.7	2.5	19.6	19.8	20.1	21.1	17.4
304	-16.3	3.7	3.9	3.7	19.7	19.8	20.1	21.2	16.9
305	-16.1	4.4	4.7	4.5	19.6	19.8	20.1	20.2	16.6
306	-15.5	6.2	6.3	6.1	20	20.1	20.4	20.6	15.9
307	-14.9	8.3	8.5	8.3	19.9	20.1	20.4	20.7	15.2
308	-14	9.6	9.9	9.7	19.9	20	20.3	20.7	14.5
309	-13.7	11.1	11.5	11.3	20.1	20.3	20.6	21.1	13.8
310	-13.1	12	12.3	12.1	20.6	20.7	21	21.6	13.3
311	-12.9	12.1	12.2	12	21	21.2	21.5	22.2	12.8
312	-11.9	12.3	12.5	12.3	21.5	21.6	21.9	22.7	12.1
313	-11.3	12.6	12.7	12.5	21.8	22	22.3	23.2	11.4
314	-11.1	13.4	13.6	13.4	22.1	22.2	22.5	23.5	10.7
315	-10.9	14.2	14.5	14.3	22.4	22.6	22.9	24	10.2
316	-10	14.1	14.2	14	22.8	22.9	23.2	24.2	9.3
317	-9.1	14.7	14.9	14.7	23	23.2	23.5	24.4	9.2
318	-8.2	15.3	15.6	15.4	23	23.1	23.4	24.2	8.8
319	-7.3	15.7	16.1	15.9	22.7	22.9	23.1	23.8	8.4
320	-6.9	15.9	16.2	16	22.9	23	23.1	23.7	8
321	-5.7	16	16.1	15.9	22.3	22.5	22.7	23.2	7.6
322	-4.6	17.2	17.4	17.2	22.2	22.3	22.4	22.9	7
323	-3.9	18.1	18.4	18.2	22	22.2	22.4	22.9	5.7
324	-3	18.5	18.8	18.6	23.3	23.4	23.5	23.6	4.4
325	-4.5	18.9	19.2	19	23.4	23.6	23.8	24	3.3
326	-2.9	19.2	19.5	19.3	23.6	23.7	23.8	24.1	2.3
327	-1.8	19.4	19.7	19.5	23.8	24	24.2	24.6	1.7
328	-0.7	19.6	19.9	19.7	24	24.3	24.4	24.9	1.1
329	0.4	19.8	20.1	19.9	24	24.4	24.5	25.1	0.7
330	1.5	19.8	20.1	19.9	24.3	24.8	24.9	25.6	0.5
331	2	19.8	20.1	19.9	24.4	25	25.1	25.9	0.3
332	3.1	20.1	20.4	20.2	24.7	25.4	25.5	26.4	-0.1
333	3.8	20.1	20.4	20.2	25	25.8	25.9	26.9	-0.5
334	5.9	20	20.3	20.1	25.3	25.4	25.5	26.6	-1.2
335	8	20.3	20.6	20.4	25.5	25.7	25.8	25.9	-1.7
336	9	20.5	20.6	20.4	25.5	25.6	25.7	25.9	-2.6
337	10.2	21.1	21.3	21.1	25.5	25.6	25.7	26	-2.8
338	11.3	21.6	21.9	21.7	25.7	25.8	25.9	26.3	-3.3
339	12.4	22.1	22.5	22.3	25.5	25.6	25.7	26.2	-3.8
340	13.3	22.2	22.5	22.3	25.6	25.7	25.9	26.5	-4.3
341	14	22.4	22.5	22.3	24.5	24.6	24.7	25	-5.1
342	14.5	22.8	23	22.8	24	24.1	24.3	24.7	-6.1
343	15	23.2	23.5	23.3	23.5	23.6	23.7	24.2	-6.8
344	16	22.9	23	22.8	23.2	23.3	23.5	24.1	-7.5
345	16.3	22.8	23	22.8	23.1	23.2	23.3	24	-8
346	16.6	23	23.3	23.1	22.8	22.9	23.1	23.9	-8.9
347	16.9	22.6	23	22.8	22.5	22.6	22.9	23.8	-9.7
348	17	22.3	22.6	22.4	22.2	22.3	22.7	23.5	-10.5
349	17.1	21.8	21.9	21.7	22	22.2	22.6	23.3	-11
350	17.2	21.8	22	21.8	21.6	21.7	22.1	22.7	-11.5
351	18.2	21.2	21.3	21.1	21.3	21.5	21.9	22.4	-12
352	18.8	21.2	21.4	21.2	21.1	21.2	21.6	21.9	-13
353	19.3	21	21.3	21.1	20.7	20.9	21.3	21.7	-13.7
354	19.5	20.3	20.4	20.2	19.9	20	20.4	20.9	-14.3
355	19.7	20	20.2	20	19.5	19.7	20.1	20.7	-15.1
356	20	19.7	20	19.8	19.1	19.4	19.8	20.5	-16.4
357	20.2	19.5	19.9	19.7	18.5	18.9	19.3	20.1	-17
358	20.4	19.2	19.5	19.3	17.9	18.3	18.7	19.6	-17.4
359	20.6	18.8	18.9	18.7	17.3	17.7	18.1	18.2	-18
360	21.2	18.4	18.6	18.4	16.7	17.1	17.5	17.7	-18
361	21.8	17.8	17.9	17.7	16.2	16.6	17	17.3	-18.2
362	22.4	17.7	17.9	17.7	16	16.4	16.8	17.2	-18.4
363	23	17.6	17.9	17.7	15.8	16.2	16.6	17.1	-18.7
364	23.6	17.5	17.6	17.4	15.2	15.6	16	16.6	-19
365	23.7	17.7	17.9	17.7	14.6	15	15.4	16.1	-18.9
366	23.5	17.6	17.9	17.7	13.5	13.9	14.3	15.1	-19.4
367	23.3	17.7	18.1	17.9	13.5	13.9	14.3	15.2	-19
368	23.6	17.2	17.5	17.3	13	13.4	13.8	14.8	-18.9
369	23.5	16.3	16.4	16.2	13	13.4	13.8	14.9	-19.1
370	23.3	16.3	16.5	16.3	12.6	13	13.4	13.5	-19.3
371	23.3	16.1	16.2	16	12	12.4	12.8	13	-18.7
372	23.3	15.6	15.8	15.6	12.4	12.8	13.1	13.4	-18.7
373	23.3	15.4	15.7	15.5	12.1	12.5	12.8	13.2	-19
374	22.1	15.1	15.5	15.3	11.5	11.9	12.2	12.7	-18.5
375	21.9	13.7	14	13.8	11.5	11.9	12.2	12.8	-18.1
376	21.5	13.9	14	13.8	11.3	11.7	12	12.7	-18
377	19.8	13.9	14.1	13.9	11.1	11.5	11.8	12.6	-17.5
378	19.4	13.9	14.2	14	10.9	11.3	11.6	12.5	-16.9
379	19	13.6	13.7	13.5	10.5	10.9	11.2	12.2	-16.7
380	18.6	12.6	12.8	12.6	10	10.4	10.7	11.8	-16.6
381	18.2	13	13.3	13.1	9.9	10.3	10.6	11.6	-15.6
382	17.8	12.7	13.1	12.9	9.1	9.5	9.8	10.7	-15.7
383	17.4	12.2	12.5	12.3	8.5	8.9	9.2	10	-15.3
384	17.3	12.2	12.3	12.1	7.7	8.1	8.4	9.1	-14.5
385	17.2	12.2	12.4	12.2	7.1	7.5	7.8	8.4	-13.5
386	16.7	11.5	11.6	11.4	6.3	6.7	7	7.5	-13
387	16.5	11.2	11.4	11.2	5.7	6.1	6.4	6.9	-12.9
388	17	10.5	10.8	10.6	4.9	5.3	5.6	6.1	-12.1
389	17	9.6	9.7	9.5	4.3	4.7	5	5.5	-11.9
390	16.7	9.2	9.4	9.2	3.5	3.9	4.2	4.7	-11
391	16.1	8.3	8.6	8.4	2.9	3.3	3.6	4.2	-10
392	15.8	8.3	8.7	8.5	2.6	3	3.3	3.9	-10
393	15.5	7.2	7.5	7.3	2	2.4	2.7	3.3	-9.8
394	15	6.5	6.6	6.4	1.1	1.5	1.8	2.4	-9.2
395	15	6.4	6.6	6.4	0.4	0.8	1.1	1.7	-8.2
396	14.5	5.6	5.7	5.5	-1.1	-0.7	-0.4	0.2	-7.3
397	13	5	5.2	5	-1.9	-1.5	-1.2	-0.6	-6.5
398	13.5	4.4	4.7	4.5	-2.9	-2.5	-2.2	-1.6	-5.9
399	13.6	3.5	3.6	3.4	-3.4	-3	-2.7	-2.1	-4.5
400	13.3	2.9	3.1	2.9	-4.1	-3.7	-3.4	-2.8	-3.5
401	13	2.3	2.6	2.4	-4.6	-4.2	-3.9	-3.4	-2.6
402	12	1.4	1.8	1.6	-5.3	-4.9	-4.6	-4.1	-2.2
403	12.4	0.6	0.9	0.7	-6.1	-5.7	-5.4	-4.8	-3.5
404	12.1	-0.3	-0.2	-0.4	-7.1	-6.7	-6.4	-5.8	-2.1
405	11.5	-0.9	-0.7	-0.9	-7.6	-7.2	-6.9	-6.3	-0.9
406	11.5	-1.7	-1.6	-1.8	-8.3	-7.9	-7.6	-7	0.2
407	11.2	-2.3	-2.1	-2.3	-8.8	-8.4	-8.1	-7.5	1.2
408	10.9	-2.9	-2.6	-2.8	-9.5	-9.1	-8.7	-8.1	2.5
409	10.8	-3.5	-3.1	-3.3	-10.3	-9.9	-9.5	-8.9	3.2
410	10.3	-4.3	-4	-4.2	-11.3	-10.9	-10.5	-9.9	4.2
411	9.9	-5.2	-5.1	-5.3	-11.8	-11.4	-11	-10.4	5.1
412	9.7	-5.8	-5.6	-5.8	-12.5	-12.1	-11.7	-11.2	6.7
413	9	-6.4	-6.1	-6.3	-13	-12.6	-12.2	-11.7	9
414	8.3	-7.3	-7.2	-7.4	-14	-13.6	-13.2	-12.7	9.8
415	7.6	-7.9	-7.7	-7.9	-14.5	-14.1	-13.7	-13.2	11.1
416	6.9	-8.5	-8.2	-8.4	-15.1	-14.7	-14.6	-14.1	12.2
417	6.2	-9.1	-8.7	-8.9	-15.9	-15.5	-15.4	-14.9	13.2
418	5.5	-9.9	-9.6	-9.8	-16.9	-16.5	-16.4	-15.9	14.3
419	4.8	-10.8	-10.7	-10.9	-17.4	-17	-16.9	-16.4	15.2
420	4.1	-11.4	-11.2	-11.4	-18.1	-17.7	-17.6	-17.1	15.9
421	3.4	-12.2	-12.1	-12.3	-18.6	-18.2	-18.1	-17.6	16.4
422	2.7	-12.7	-12.5	-12.7	-18.9	-18.5	-18.4	-17.9	16.6
423	2.5	-13.1	-12.8	-13	-19	-18.6	-18.5	-18	17.1
424	1.8	-13.8	-13.7	-13.9	-19.3	-18.9	-18.8	-18.3	17.4
425	1	-14.5	-14.3	-14.5	-19.3	-18.9	-18.8	-18.3	17.8
426	0.2	-15.2	-14.9	-15.1	-19.7	-19.3	-19.2	-18.7	17.9
427	-1.2	-15.2	-14.8	-15	-19.5	-19.1	-19	-18.5	18.4
428	-2.1	-15.7	-15.4	-15.6	-19.9	-19.5	-19.3	-18.8	18.4
429	-3	-16.3	-16.2	-16.4	-19.6	-19.2	-19.1	-18.6	19
430	-3.6	-16.4	-16.2	-16.4	-19.8	-19.4	-19.2	-18.7	19.8
431	-4.2	-16.7	-16.6	-16.8	-19.7	-19.3	-19.2	-18.7	20.7
432	-4.8	-17	-16.8	-17	-19.8	-19.4	-19.2	-18.7	20.5
433	-5.4	-17.3	-17	-17.2	-19.8	-19.4	-19.3	-18.8	20.9
434	-6.3	-17.9	-17.8	-18	-19.7	-19.3	-19.1	-18.6	21.2
435	-7.2	-18.1	-17.9	-18.1	-19.3	-18.9	-18.6	-18.1	21.6
436	-7.8	-18.2	-17.9	-18.1	-19.1	-18.7	-18.3	-17.8	21.2
437	-8.4	-18.3	-17.9	-18.1	-18.7	-18.3	-17.9	-17.4	21.2
438	-9	-18.7	-18.4	-18.6	-18.4	-18	-17.6	-17.1	21.8
439	-9.6	-19.3	-19.2	-19.4	-17.9	-17.5	-17.1	-16.6	22.4
440	-10.5	-19.3	-19.1	-19.3	-17.6	-17.2	-16.8	-16.3	23.4
441	-11.4	-19.7	-19.6	-19.8	-17.3	-16.9	-16.5	-16	23.7
442	-12	-19.5	-19.3	-19.5	-16.7	-16.3	-15.9	-15.4	23.9
443	-12.6	-19.7	-19.4	-19.6	-15.8	-15.4	-15	-14.5	24
444	-13.2	-19.4	-19	-19.2	-15.5	-15.1	-14.7	-14.2	24.9
445	-14.1	-19.6	-19.3	-19.5	-14.9	-14.5	-14.1	-13.6	25.3
446	-14.7	-19.8	-19.7	-19.9	-14.5	-14.1	-13.7	-13.2	25.5
447	-15.2	-19.7	-19.5	-19.7	-13.6	-13.2	-12.8	-12.3	25.7
448	-16.1	-19.4	-19.1	-19.3	-13.5	-13.1	-12.7	-12.2	26
449	-17	-19.7	-19.6	-19.8	-12.6	-12.2	-11.8	-11.3	26.2
450	-17.6	-19.7	-19.5	-19.7	-12.3	-11.9	-11.5	-11	26.4
451	-18.2	-19.8	-19.5	-19.7	-11.3	-10.9	-10.5	-10	26.7
452	-18.8	-19.7	-19.3	-19.5	-10.9	-10.5	-10.1	-9.6	26.8
453	-19	-20	-19.7	-19.9	-10.7	-10.3	-9.9	-9.4	27.1
454	-19.2	-19.7	-19.6	-19.8	-10.7	-10.3	-9.9	-9.8	27.3
455	-19.4	-19.3	-19.1	-19.3	-9.5	-9.1	-8.7	-8.5	27.9
456	-19.5	-19.1	-19	-19.2	-8.5	-8.1	-7.7	-7.4	27.7
457	-19.8	-18.7	-18.5	-18.7	-7.6	-7.2	-6.8	-6.4	27.9
458	-19.7	-18.2	-17.9	-18.1	-6.9	-6.5	-6.1	-5.6	27.9
459	-20	-18	-17.9	-18.1	-6.5	-6.1	-5.7	-5.1	28.2
460	-19.8	-17.5	-17.3	-17.5	-5.2	-4.8	-4.5	-3.8	28.3
461	-19.9	-17.2	-16.9	-17.1	-4.1	-3.7	-3.4	-2.6	28.5
462	-19.9	-16.5	-16.1	-16.3	-3.7	-3.3	-3	-2.1	28.3
463	-19.9	-16	-15.7	-15.9	-2.5	-2.1	-1.8	-0.8	28.1
464	-20	-16	-15.9	-16.1	-3.9	-3.5	-3.2	-2.1	28.2
465	-19.8	-15.3	-15.1	-15.3	-2.3	-1.9	-1.6	-1.5	27.9
466	-19.5	-14.8	-14.7	-14.9	-1.4	-1	-0.7	-0.5	27.4
467	-19.2	-13.8	-13.6	-13.8	-0.3	0.1	0.4	0.7	27.4
468	-18.9	-13.4	-13.1	-13.3	0.6	1	1.3	1.7	27.1
469	-18.5	-13	-12.9	-13.1	2	2.4	2.7	3.2	26.8
470	-18.1	-12.7	-12.5	-12.7	2.6	3	3.3	3.9	26.5
471	-17.7	-11.6	-11.3	-11.5	3.7	4.1	4.4	5.1	26.2
472	-17.5	-10.9	-10.5	-10.7	4.2	4.6	4.9	5.7	25.7
473	-16.8	-10.8	-10.5	-10.7	6.3	6.7	7	7.9	25.4
474	-16	-10.8	-10.7	-10.9	8.2	8.6	8.9	9.9	24.8
475	-15.6	-9.8	-9.6	-9.8	9.5	9.9	10.2	11.3	24.4
476	-15.1	-9	-8.9	-9.1	10.8	11.2	11.5	12.5	23.7
477	-14.6	-8	-7.8	-8	11.9	12.3	12.6	13.5	23.5
478	-13.8	-7	-6.7	-6.9	12.1	12.5	12.8	13.6	23.3
479	-13.6	-6.5	-6.1	-6.3	12.3	12.7	13	13.7	23.2
480	-12.8	-5.4	-5.1	-5.4	12.6	13	13.3	13.9	22.5
481	-12.4	-4.5	-4.4	-4.5	13.4	13.8	14.1	14.6	21.9
482	-11.5	-3.7	-3.5	-3.7	14	14.4	14.7	15.2	21.6
483	-11	-2.7	-2.4	-2.7	14.2	14.6	14.9	15.4	20.7
484	-10.9	-4.4	-4.3	-4.4	14.6	15	15.3	15.4	20.3
485	-10.8	-2.7	-2.5	-2.7	15.2	15.6	15.9	16.1	20
486	-9.7	-1.5	-1.2	-1.5	15.4	15.8	16.1	16.4	19.3
487	-8.6	-0.3	0.1	-0.3	15.8	16.2	16.5	16.9	18.7
488	-7.8	0.7	1	0.7	16	16.4	16.7	17.2	18.3
489	-7	1.6	1.7	1.6	17.2	17.6	17.9	18.5	17.4
490	-6.7	2.2	2.4	2.2	17.9	18.3	18.6	19.3	17.1
491	-5.3	3.2	3.3	3.2	18.4	18.8	19.1	19.9	16.8
492	-4.3	4	4.2	4	18.7	19.1	19.4	20.3	16.3
493	-3.8	6.2	6.5	6.2	19.1	19.5	19.8	20.8	15.4
494	-2.7	8.1	8.2	8.1	19.2	19.6	19.9	21	14.5
495	-4	9.2	9.4	9.2	19.5	19.9	20.2	20.3	13.8
496	-2.5	10.5	10.8	10.5	19.6	20	20.4	20.6	13.3
497	-1.5	11.7	12.1	11.7	19.7	20.1	20.5	20.8	12.8
498	-0.5	12.7	13	12.7	19.6	20	20.4	20.8	12.1
499	0.5	13.4	13.5	13.4	20	20.4	20.8	21.3	11.4
500	1.8	14.2	14.4	14.2	19.9	20.3	20.7	21.3	10.7
501	2.5	14.6	14.7	14.6	19.9	20.3	20.7	21.4	10.2
502	3.5	15.2	15.4	15.2	20.1	20.5	20.9	21.7	9.3
503	4.1	16.3	16.6	16.3	20.6	21	21.4	22.3	9.2
504	6.1	16.4	16.5	16.4	21	21.4	21.8	22.8	8.8
505	8.1	16.8	17	16.8	21.5	21.9	22.3	23.4	8.1
506	9.3	17.2	17.5	17.2	21.8	22.2	22.6	23.6	7.7
507	10.7	17.4	17.8	17.4	22.1	22.5	22.9	23.8	7.3
508	11.7	17.4	17.7	17.4	22.4	22.8	23.2	24	6.9
509	12	17.3	17.4	17.3	22.8	23.2	23.6	24.3	5.8
510	12.1	18.4	18.6	18.4	23	23.4	23.8	24.4	4.7
511	12.5	18.9	19	18.9	23	23.4	23.8	24.3	3.4
512	13.2	19.5	19.7	19.5	22.7	23.1	23.5	24	2.6
513	13.9	19.8	20.1	19.8	22.9	23.3	23.7	24.2	1.8
514	14	20.1	20.5	20.1	22.3	22.7	23.1	23.2	1.2
515	14.5	20.3	20.6	20.3	22.2	22.6	23	23.2	0.4
516	15	20.3	20.4	20.3	22	22.4	22.8	23.1	0.2
517	15.3	20.6	20.8	20.6	23.3	23.7	24.1	24.5	0
518	15.6	20.9	21.2	20.9	23.4	23.8	24.2	24.7	-0.2
519	15.9	21.3	21.4	21.3	23.6	24	24.4	25	-0.4
520	17	22	22.2	22	23.8	24.2	24.6	25.3	-0.9
521	17.8	22.7	23	22.7	24	24.4	24.8	25.6	-1.6
522	18.2	23.4	23.8	23.4	24	24.4	24.8	25.7	-2.3
523	18.6	23.4	23.7	23.4	24.3	24.7	25.1	26.1	-2.7
524	18.9	22.9	23	22.9	24.4	24.8	25.2	26.3	-3.2
525	19.1	22.9	23.1	22.9	24.7	25.1	25.5	25.6	-4.1
526	19.3	22.9	23	22.9	25	25.4	25.8	26	-4.6
527	19.5	22.1	22.3	22.1	25.3	25.7	26.1	26.4	-5.4
528	19.5	21.8	22.1	21.8	25.5	25.9	26.3	26.7	-6.2
529	19.5	19.9	20	19.9	25.5	25.9	26.3	26.8	-6.7
530	19.8	19.6	19.8	19.6	25.5	25.9	26.3	26.9	-7.2
531	19.8	19.3	19.6	19.3	25.7	26.1	26.5	27.2	-7.9
532	19.7	19	19.4	19	25.5	25.9	26.3	27.1	-8.6
533	20	18.5	18.8	18.5	25.3	25.7	26.1	27	-9.6
534	20.4	17.9	18	17.9	25.8	26.2	26.6	27.6	-10.4
535	20.9	17.6	17.8	17.6	25.8	26.2	26.6	27.7	-11.3
536	21.3	17.4	17.5	17.4	25.8	26.2	26.6	27.6	-11.8
537	21.7	17.4	17.6	17.4	25.8	26.2	26.6	27.5	-12.3
538	21.9	17	17.3	17	25.8	26.1	26.4	27.2	-13.1
539	22.3	16.6	16.7	16.6	24.5	24.7	24.9	25	-13.6
540	22.6	17.2	17.4	17.2	24	24.3	24.6	24.8	-14
541	22.9	17.3	17.6	17.3	23.5	23.9	24.3	24.6	-15
542	22.8	17.1	17.5	17.1	23.2	23.7	24.2	24.6	-16.1
543	22.6	16.4	16.7	16.4	23.1	23.7	24.3	24.8	-16.9
544	22.7	15.9	16	15.9	22.8	23.5	24.2	24.8	-17.3
545	22.2	15.7	15.9	15.7	22.5	23.3	24.1	24.8	-18.3
546	22	15.1	15.2	15.1	22.2	23.1	24	24.8	-18.3
547	21.7	15.2	15.4	15.2	22	22.1	22.2	23.1	-18.5
548	21.6	14.8	15.1	14.8	21.6	21.8	22	23	-18.5
549	21.1	13.4	13.8	13.4	21.3	21.4	21.5	22.6	-18.6
550	21	13.8	14.1	13.8	21.1	21.3	21.5	21.6	-18.7
551	20.7	13.7	13.8	13.7	20.7	20.8	20.9	21.1	-18.8
552	20.2	13.5	13.7	13.5	19.9	20.1	20.3	20.6	-19.1
553	19.8	13.3	13.6	13.3	19.5	19.6	19.7	20.1	-19.1
554	19.4	12.1	12.2	12.1	19.1	19.3	19.5	20	-19
555	19.1	12.6	12.8	12.6	18.5	18.6	18.7	19.3	-19.4
556	18.9	12.4	12.7	12.4	17.9	18.1	18.3	19	-19.3
557	18.7	11.8	12.2	11.8	17.3	17.4	17.5	18.3	-18.9
558	18.2	11.5	11.8	11.5	16.7	16.9	17.1	18	-18.9
559	17.7	10.8	10.9	10.8	16.2	16.3	16.4	17.4	-19
560	17.5	10.7	10.9	10.7	16	16.2	16.4	17.5	-18.7
561	17.3	10.6	10.7	10.6	15.8	15.9	16	17	-18.3
562	17.4	10.3	10.5	10.3	15.2	15.4	15.6	16.5	-17.8
563	17.5	10.1	10.4	10.1	14.6	14.7	14.8	15.6	-17.6
564	17.3	9.5	9.6	9.5	13.5	13.7	13.9	14.6	-17
565	17.3	8.7	8.9	8.7	13.5	13.6	13.7	14.3	-16.8
566	16.9	8.2	8.5	8.2	13	13.2	13.4	13.9	-16.7
567	16.2	7.7	8.1	7.7	13	13.1	13.2	13.7	-15.7
568	16.1	7	7.3	7	12.6	12.8	13	13.1	-15.6
569	16	6.2	6.3	6.2	12	12.1	12.2	12.4	-15.2
570	15.4	5.4	5.6	5.4	12.4	12.6	12.8	13.1	-14.4
571	15.1	4.4	4.5	4.4	12.1	12.2	12.3	12.7	-13.6
572	14.7	3.9	4.1	3.9	11.5	11.7	11.9	12.4	-12.7
573	13.4	3.4	3.7	3.4	11.5	11.6	11.7	12.3	-13
574	13.8	2.6	2.7	2.6	11.3	11.5	11.7	12.4	-12.2
575	13.7	2.3	2.5	2.3	11.1	11.2	11.3	12.1	-12
576	13.6	1.8	2.1	1.8	10.9	11.1	11.3	12.2	-11.1
577	13.5	1.3	1.7	1.3	10.5	10.6	10.7	11.7	-10.1
578	12.4	0.2	0.5	0.2	10	10.2	10.4	11.5	-9.9
579	12.7	-1.6	-1.5	-1.6	9.9	10	10.1	10.2	-9.7
580	12.3	-2.3	-2.1	-2.3	9.1	9.3	9.5	9.7	-9.1
581	11.9	-3	-2.7	-3	8.5	8.6	8.7	9	-8.3
582	12.1	-3.5	-3.2	-3.5	7.7	7.9	8.1	8.5	-7
583	12	-4.3	-4	-4.3	7.1	7.2	7.3	7.8	-6.6
584	11.4	-5.1	-4.8	-5.1	6.3	6.5	6.7	7.3	-6
585	11	-5.9	-5.6	-5.9	5.7	5.8	5.9	6.6	-4.6
586	10.2	-6.5	-6.2	-6.5	4.9	5.1	5.3	6.1	-3.6
587	9.5	-7.1	-6.8	-7.1	4.3	4.4	4.5	5.4	-2.7
588	9	-7.4	-7.1	-7.4	3.5	3.7	3.9	4.9	-2.1
589	8	-7.8	-7.5	-7.8	2.9	3	3.1	4.2	-3.4
590	7.9	-8.5	-8.2	-8.5	2.6	2.8	3	4	-2
591	6.9	-9.2	-8.9	-9.2	2	2.1	2.2	3.1	-1
592	6.4	-9.9	-9.6	-9.9	1.1	1.3	1.5	2.3	0.5
593	6.2	-10.6	-10.3	-10.6	0.4	0.5	0.6	1.3	1.1
594	5.5	-11.5	-11.4	-11.5	-1.1	-0.9	-0.7	-0.1	2.4
595	4.8	-12.1	-11.9	-12.1	-1.9	-1.8	-1.7	-1.2	3.1
596	4.1	-12.7	-12.4	-12.7	-2.9	-2.7	-2.5	-2	4.1
597	3.4	-13.3	-12.9	-13.3	-3.4	-3.3	-3.2	-3.1	5
598	2.7	-14.1	-13.8	-14.1	-4.1	-3.9	-3.7	-3.5	6.8
599	2	-15	-14.9	-15	-4.6	-4.5	-4.4	-4.1	9.1
600	1	-15.6	-15.4	-15.6	-5.3	-5.1	-4.9	-4.5	9.9
601	0.3	-16.2	-15.9	-16.2	-6.1	-6	-5.9	-5.4	11
602	-0.4	-17.1	-17	-17.1	-7.1	-6.9	-6.7	-6.1	12.5
603	-1.1	-17.7	-17.5	-17.7	-7.6	-7.5	-7.4	-6.7	13.1
604	-1.8	-18.3	-18	-18.3	-8.3	-8.1	-7.9	-7.1	14.2
605	-2.5	-18.9	-18.5	-18.9	-8.8	-8.7	-8.6	-7.7	15.1
606	-3.2	-19.7	-19.4	-19.7	-9.5	-9.3	-9.1	-8.1	15.8
607	-3.9	-20	-19.9	-20	-10.3	-10.2	-10.1	-9	16.3
608	-4.6	-19.9	-19.7	-19.9	-11.3	-11.1	-10.9	-10.8	16.7
609	-5.3	-20.1	-20	-20.1	-11.8	-11.7	-11.6	-11.4	17.2
610	-6	-19.8	-19.6	-19.8	-12.5	-12.3	-12.1	-11.8	17.5
611	-6.7	-19	-18.7	-19	-13	-12.9	-12.8	-12.4	17.7
612	-7.4	-19.7	-19.6	-19.7	-14	-13.8	-13.6	-13.1	18.2
613	-8.1	-19.3	-19.1	-19.3	-14.5	-14.4	-14.3	-13.7	18.3
614	-8.8	-18.9	-18.6	-18.9	-15.1	-14.9	-14.7	-14	18.3
615	-9.5	-18.5	-18.1	-18.5	-15.9	-15.8	-15.7	-14.9	18.9
616	-10.2	-18.2	-17.9	-18.2	-16.9	-16.7	-16.5	-15.6	19.7
617	-10.9	-18	-17.9	-18	-17.4	-17.3	-17.2	-16.2	20.6
618	-11.6	-17.5	-17.3	-17.5	-18.1	-17.9	-17.7	-16.6	20.6
619	-12.3	-17.4	-17.3	-17.4	-18.6	-18.5	-18.4	-17.4	21
620	-12.9	-16.7	-16.5	-16.7	-18.9	-18.7	-18.5	-17.6	21.3
621	-13.4	-16	-15.7	-16	-19	-18.9	-18.8	-18	21.5
622	-13.9	-16	-15.9	-16	-19.3	-19.1	-18.9	-18.2	21.5
623	-14.7	-15.3	-15.1	-15.3	-19.3	-19.2	-19.1	-18.5	21.1
624	-15.5	-14.6	-14.3	-14.6	-19.7	-19.5	-19.3	-18.8	21.7
625	-15.6	-13.6	-13.2	-13.6	-19.5	-19.4	-19.3	-18.8	22.3
626	-16	-13.4	-13.1	-13.4	-19.9	-19.7	-19.5	-19	23.3
627	-16.4	-13	-12.9	-13	-19.6	-19.5	-19.4	-19.3	23.6
628	-16.6	-12.7	-12.5	-12.7	-19.8	-19.6	-19.4	-19.2	24
629	-16.8	-11.8	-11.7	-11.8	-19.7	-19.6	-19.5	-19.2	24.1
630	-17.2	-11.1	-10.9	-11.1	-19.8	-19.6	-19.4	-19	25
631	-17.6	-10.8	-10.5	-10.8	-19.8	-19.7	-19.6	-19.1	25.2
632	-18	-10.5	-10.1	-10.5	-19.7	-19.5	-19.3	-18.7	25.8
633	-18.3	-9.7	-9.4	-9.7	-19.3	-19.2	-19.1	-18.4	25.6
634	-18.5	-9	-8.9	-9	-19.1	-18.9	-18.7	-17.9	25.9
635	-18.7	-8	-7.8	-8	-18.7	-18.6	-18.5	-17.6	26.1
636	-19	-7	-6.7	-7	-18.4	-18.2	-18	-17	26.3
637	-19.4	-6.8	-6.7	-6.8	-17.9	-17.8	-17.7	-16.6	26.6
638	-19.5	-5.5	-5.3	-5.5	-17.6	-17.4	-17.2	-17.1	26.9
639	-19.8	-4.3	-4	-4.3	-17.3	-17.2	-17.1	-16.9	27.2
640	-19.7	-3.5	-3.1	-3.5	-16.7	-16.5	-16.3	-16	27.4
641	-20	-2.7	-2.4	-2.7	-15.8	-15.7	-15.6	-15.2	27.8
642	-19.8	-4.4	-4.3	-4.4	-15.5	-15.3	-15.1	-14.6	28
643	-19.9	-2.7	-2.5	-2.7	-14.9	-14.8	-14.7	-14.1	27.8
644	-19.9	-1.7	-1.6	-1.7	-14.5	-14.3	-14.1	-13.8	27.8
645	-19.9	-0.5	-0.3	-0.5	-13.6	-13.5	-13.4	-13	28.1
646	-19.7	0.7	1	0.7	-13.5	-13.3	-13.1	-12.6	28.2
647	-19.8	1.6	1.7	1.6	-12.6	-12.5	-12.4	-11.8	28.4
648	-19.9	2.2	2.4	2.2	-12.3	-12.1	-11.9	-11.2	28.4
649	-20.1	3.4	3.7	3.4	-11.3	-11.2	-11.1	-10.3	28.2
650	-20.1	4.2	4.6	4.2	-10.9	-10.7	-10.5	-9.6	28.3
651	-20.3	6.2	6.5	6.2	-10.7	-10.6	-10.5	-9.7	27.8
652	-19.8	8.1	8.2	8.1	-10.7	-10.5	-10.3	-9.6	27.7
653	-19.5	9.2	9.4	9.2	-9.5	-9.4	-9.3	-8.7	27.3
654	-19.2	10.3	10.4	10.3	-8.5	-8.3	-8.1	-7.6	27
655	-18.9	11.5	11.7	11.5	-7.6	-7.5	-7.4	-7.1	26.7
656	-18.5	12.7	13	12.7	-6.9	-6.7	-6.5	-6.1	26.4
657	-18.1	13.4	13.5	13.4	-6.5	-6.4	-6.3	-5.8	26.1
658	-17.7	14.2	14.4	14.2	-5.2	-5	-4.8	-4.2	25.8
659	-17.5	14.8	15.1	14.8	-4.1	-4	-3.9	-3.2	25.5
660	-16.9	15.4	15.8	15.4	-3.7	-3.5	-3.3	-2.5	24.9
661	-16.3	16.3	16.6	16.3	-2.5	-2.4	-2.3	-1.4	24.3
662	-16.1	16.4	16.5	16.4	-3.9	-3.7	-3.5	-3.4	24
663	-15.5	16.8	17	16.8	-2.3	-2.2	-2.1	-1.9	23.4
664	-14.9	17	17.1	17	-1.4	-1.2	-1	-0.7	23.2
665	-14	17.2	17.4	17.2	-0.3	-0.2	-0.1	0.3	23.1
666	-13.7	17.4	17.7	17.4	0.6	0.8	1	1.5	22.4
667	-13.1	17.6	18	17.6	2	2.1	2.2	2.8	21.8
668	-12.9	18.5	18.8	18.5	2.6	2.8	3	3.7	21.7
669	-11.9	18.9	19	18.9	3.7	3.8	3.9	4.7	20.8
670	-11.3	19.5	19.7	19.5	4.2	4.4	4.6	5.5	20.4
671	-11.1	19.8	20.1	19.8	6.3	6.4	6.5	7.5	19.9
672	-10.9	19.8	19.9	19.8	8.2	8.4	8.6	9.7	19.6
673	-10	20.2	20.4	20.2	9.5	9.8	10.1	10.2	18.6
674	-9.1	20.5	20.8	20.5	10.8	11.2	11.6	11.8	18.2
675	-8.2	20.8	21.2	20.8	11.9	12.4	12.9	13.2	17.3
676	-7.3	20.9	21.2	20.9	12.1	12.7	13.3	13.7	17
677	-6.9	21.3	21.4	21.3	12.3	13	13.7	14.2	16.7
678	-5.7	22	22.2	22	12.6	13.4	14.2	14.8	16.4
679	-4.6	22.5	22.6	22.5	13.4	13.5	13.6	14.3	15.5
680	-3.9	23.2	23.4	23.2	14	14.2	14.4	15.2	14.6
681	-3	23.9	24.2	23.9	14.2	14.3	14.4	15.3	13.7
682	-4.5	23.8	23.9	23.8	14.6	14.7	14.8	15.8	13.2
683	-2.9	23.7	23.9	23.7	15.2	15.3	15.4	16.5	12.3
684	-1.8	23.6	23.9	23.6	15.4	15.5	15.6	16.6	11.8
685	-0.7	24	24.4	24	15.8	15.9	16	16.9	11.3
686	0.4	23.8	24.1	23.8	16	16.1	16.2	17	10.8
687	1.5	23.4	23.5	23.4	17.2	17.3	17.4	18.1	10.3
688	2	23.5	23.7	23.5	17.9	18	18.1	18.7	9.8
689	3.1	23.4	23.5	23.4	18.4	18.5	18.6	19.1	9.5
690	3.8	23.5	23.7	23.5	18.7	18.8	18.9	19.4	8.9
691	5.9	22.4	22.7	22.4	19.1	19.2	19.3	19.8	8.3
692	8	22	22.1	22	19.2	19.3	19.4	19.9	7.9
693	9	21.7	21.9	21.7	19.5	19.6	19.7	20.2	7.1
694	10.2	20.1	20.4	20.1	19.6	19.8	20	20.6	6.7
695	11.3	19.8	20.2	19.8	19.7	19.8	19.9	20.5	5.6
696	12.4	19.3	19.6	19.3	19.6	19.8	20	20.6	4.5
697	13.3	18.7	18.8	18.7	20	20.1	20.2	20.8	3.4
698	14	18.4	18.6	18.4	19.9	20.1	20.3	20.9	2.8
699	14.5	17.9	18	17.9	19.9	20	20.1	21.2	2
700	15	17.6	17.8	17.6	20.1	20.3	20.5	21.5	1.2
701	16	17.6	17.9	17.6	20.6	20.9	21.2	22.1	0.6
702	16.3	17.6	18	17.6	21	21.4	21.8	22.6	0.4
703	16.6	17	17.3	17	21.5	21.9	22.3	23	-0.2
704	16.9	16.6	16.7	16.6	21.8	22.2	22.6	23.2	-0.4
705	17	17.2	17.4	17.2	22.1	22.5	22.9	23.4	-0.6
706	17.1	17.3	17.6	17.3	22.4	22.8	23.2	23.7	-1.1
707	17.2	16.8	16.9	16.8	22.8	23.2	23.6	24.1	-1.6
708	18.2	16.3	16.5	16.3	23	23.4	23.8	24.3	-2.1
709	18.8	16.1	16.4	16.1	23	23.4	23.8	24.3	-2.5
710	19.3	15.9	16.3	15.9	22.7	23.1	23.5	24.1	-3.2
711	19.5	15.3	15.6	15.3	22.9	23.3	23.7	24.3	-3.9
712	19.7	15.1	15.2	15.1	22.3	22.7	23.1	23.7	-4.4
713	20	14.7	14.9	14.7	22.2	22.6	23	23.6	-5.2
714	20.2	13.1	13.2	13.1	22	22.4	22.8	23.4	-6
715	20.4	13.7	13.9	13.7	23.3	23.7	24.1	24.6	-6.7
716	20.6	13.9	14.2	13.9	23.4	23.8	24.2	24.7	-7.4
717	21.2	13.4	13.5	13.4	23.6	24	24.4	24.9	-8.1
718	21.8	13.2	13.4	13.2	23.8	24.2	24.6	25.1	-8.6
719	22.4	12.3	12.6	12.3	24	24.4	24.8	25.3	-9.8
720	23	12.8	13.2	13	24	24.4	24.8	25.3	-10.6
721	23.1	12.4	12.7	12.5	24.3	24.7	25.1	25.6	-11.1
722	22.8	11.6	11.7	11.5	24.4	24.8	25.2	25.7	-11.9
723	22.7	11.7	11.9	11.7	24.7	25.1	25.5	26	-12.4
724	22.8	11.3	11.4	11.2	25	25.4	25.8	26.3	-13.2
725	21.9	11.1	11.3	11.1	25.3	25.7	26.1	26.6	-13.7
726	21.5	11.1	11.4	11.2	25.5	25.9	26.3	26.8	-14.1
727	19.8	10.4	10.5	10.3	25.5	25.9	26.3	26.8	-14.9
728	19.4	10.1	10.3	10.1	25.5	25.6	25.7	26.2	-16
729	19	10	10.3	10.1	25.8	26	26.2	26.7	-16.8
730	18.6	9.4	9.8	9.6	25.7	25.8	25.9	26.4	-17.4
731	18.2	8.6	8.9	8.7	25.7	25.9	26.1	26.6	-18
732	17.8	7.7	7.8	7.6	24.7	24.8	24.9	25.4	-18.4
733	17.4	7.1	7.3	7.1	24.1	24.3	24.5	25	-18.6
734	17.3	6.3	6.4	6.2	23.7	23.8	23.9	24.4	-18.6
735	17.2	5.7	5.9	5.7	23.3	23.5	23.7	24.2	-18.7
736	16.7	5.1	5.4	5.2	23.3	23.4	23.5	24	-18.8
737	16.5	4.5	4.9	4.7	22.9	23.1	23.3	23.8	-18.7
738	17	3.7	4	3.8	22.7	22.8	22.9	23.4	-19
739	17	2.8	2.9	2.7	22.3	22.5	22.7	23.2	-19
740	16.7	2.7	2.9	2.7	22.2	22.3	22.4	22.9	-19.1
741	16.1	2.1	2.4	2.2	21.7	21.9	22.1	22.6	-19.1
742	15.8	1.1	1.2	1	21.5	21.6	21.7	22.2	-19.4
743	15.5	0.4	0.6	0.4	21.2	21.4	21.6	22.1	-19.4
744	15	-0.9	-0.6	-0.8	20.9	21	21.1	21.6	-19.6
745	15	-1.7	-1.3	-1.5	20	20.2	20.4	20.9	-19.9
746	14.5	-2.7	-2.4	-2.6	19.7	19.8	19.9	20.4	-19
747	13	-3.5	-3.4	-3.6	19.2	19.4	19.6	20.1	-18.8
748	13.5	-4	-3.8	-4	18.7	18.8	18.9	19.4	-18.9
749	13.6	-4.7	-4.6	-4.8	18	18.2	18.4	18.9	-18.2
750	13.3	-5.2	-5	-5.2	17.5	17.6	17.7	18.8	-18
751	13	-6	-5.7	-5.9	16.8	17	17.2	18.2	-17.7
752	12	-7.1	-7	-7.2	16.4	16.5	16.6	17.5	-17.4
753	12.4	-7.6	-7.4	-7.6	16.1	16.3	16.5	17.3	-16.8
754	12.1	-8.1	-7.8	-8	16	16.1	16.2	16.9	-17
755	11.4	-8.6	-8.2	-8.4	15.3	15.5	15.7	16.3	-16.9
756	11.2	-9.3	-9	-9.2	14.8	14.9	15	15.5	-15.9
757	10.7	-10.4	-10.3	-10.5	13.6	13.8	14	14.5	-15.8
758	10.5	-11.2	-11	-11.2	13.7	13.8	13.9	14.4	-15.2
759	10.5	-11.9	-11.8	-12	13.1	13.3	13.5	14	-14.2
760	10.1	-12.4	-12.2	-12.4	13.2	13.3	13.4	13.9	-13.4
761	9.8	-12.9	-12.6	-12.8	12.7	12.9	13.1	13.7	-12.7
762	9.4	-14	-13.9	-14.1	12.2	12.3	12.4	13	-12.8
763	8.5	-14.5	-14.3	-14.5	12.5	12.7	12.9	13.5	-12
764	7.9	-14.9	-14.6	-14.8	12.3	12.4	12.5	13.1	-12.2
765	7.3	-15.7	-15.3	-15.5	11.6	11.8	12	12.9	-11.3
766	6.7	-16.7	-16.4	-16.6	11.7	11.8	11.9	12.9	-10.3
767	6.1	-17.5	-17.4	-17.6	11.4	11.6	11.8	12.9	-10.1
768	5.2	-18	-17.8	-18	11.3	11.4	11.5	11.6	-9.7
769	4.3	-18.7	-18.6	-18.8	11	11.2	11.4	11.6	-8.9
770	3.7	-18.8	-18.6	-18.8	10.7	10.8	10.9	11.2	-8.1
771	3.1	-18.6	-18.3	-18.5	10.1	10.3	10.5	10.9	-7
772	2.5	-18.7	-18.3	-18.7	10.1	10.2	10.3	10.8	-6.4
773	2.1	-18.9	-18.6	-18.9	9.2	9.4	9.6	10.2	-5.8
774	1.5	-19.4	-19.3	-19.4	8.7	8.8	8.9	9.6	-4.4
775	0.9	-19.2	-19	-19.2	7.8	8	8.2	9	-3.4
776	-0.1	-19.4	-19.1	-19.4	7.3	7.4	7.5	8.4	-2.7
777	-1.7	-19.4	-19.3	-19.4	6.4	6.6	6.8	7.8	-2.3
778	-2.5	-19.4	-19.2	-19.4	5.9	6	6.1	7.2	-3.6
779	-3.3	-19.3	-19	-19.3	5	5.2	5.4	6.4	-2
780	-3.8	-19.3	-18.9	-19.3	4.5	4.6	4.7	5.6	-1.2
781	-4.6	-19.4	-19.1	-19.4	3.6	3.8	4	4.8	0.3
782	-5.4	-19.6	-19.5	-19.6	3.1	3.2	3.3	4	1.3
783	-6.2	-19	-18.8	-19	2.7	2.9	3.1	3.7	2.3
784	-6.8	-18.6	-18.5	-18.6	2.2	2.3	2.4	2.9	3
785	-7.4	-18.3	-18.1	-18.3	1.2	1.4	1.6	2.1	4
786	-7.7	-17.9	-17.6	-17.9	0.6	0.7	0.8	1.3	4.9
787	-8.1	-17.8	-17.7	-17.8	-1	-0.8	-0.6	-0.5	6.7
788	-8.8	-17.4	-17.2	-17.4	-1.7	-1.6	-1.5	-1.3	9.2
789	-9.5	-16.9	-16.6	-16.9	-2.8	-2.6	-2.4	-2.1	10
790	-10.2	-15.9	-15.5	-15.9	-3.2	-3.1	-3	-2.6	11.1
791	-10.9	-15.3	-15	-15.3	-4	-3.8	-3.6	-3.1	12.4
792	-11.6	-15.2	-15.1	-15.2	-4.4	-4.3	-4.2	-3.6	13.4
793	-12.3	-14.7	-14.5	-14.7	-5.2	-5	-4.8	-4.1	14.1
794	-13	-14.4	-14.3	-14.4	-5.9	-5.8	-5.7	-4.9	15
795	-13.7	-13.3	-13.1	-13.3	-7	-6.8	-6.6	-5.7	15.7
796	-14.4	-12.8	-12.5	-12.8	-7.4	-7.3	-7.2	-6.2	16.2
797	-15.1	-12.3	-12.2	-12.3	-8.2	-8	-7.8	-6.7	16.6
798	-15.8	-11.9	-11.7	-11.9	-8.6	-8.5	-8.4	-8.3	17.3
799	-16.5	-11	-10.7	-11	-9.4	-9.2	-9	-8.8	17.6
800	-17.2	-10.2	-9.8	-10.2	-10.1	-10	-9.9	-9.6	17.8
801	-17.9	-10.3	-10	-10.3	-11.2	-11	-10.8	-10.4	18.1
802	-18.6	-10.6	-10.5	-10.6	-11.6	-11.5	-11.4	-10.3	18.6
803	-19.3	-9.2	-9	-9.2	-12.4	-12.2	-12	-11	18.2
804	-20	-8	-7.9	-8	-12.8	-12.7	-12.6	-11.7	18.8
805	-20.1	-7.2	-7	-7.2	-13.9	-13.7	-13.5	-12.7	19.6
806	-20.1	-6.4	-6.1	-6.4	-14.3	-14.2	-14.1	-13.4	20.5
807	-20.2	-6.1	-5.7	-6.1	-15	-14.8	-14.6	-14	20.5
808	-20	-4.6	-4.3	-4.6	-15.7	-15.6	-15.5	-15	21.1
809	-19.3	-3.6	-3.5	-3.6	-16.8	-16.6	-16.4	-15.9	21.4
810	-19.8	-2.8	-2.6	-2.8	-17.2	-17.1	-17	-16.5	21.6
811	-19.5	-1.9	-1.6	-1.9	-18	-17.8	-17.6	-17.1	21.4
812	-19.2	-3.7	-3.6	-3.7	-18.4	-18.3	-18.2	-17.7	21.4
813	-18.9	-2.4	-2.2	-2.4	-18.8	-18.6	-18.4	-17.8	21.6
814	-18.5	-1.6	-1.3	-1.6	-18.8	-18.7	-18.6	-18	22.2
815	-18.1	-0.8	-0.4	-0.8	-19.2	-19	-18.8	-18.2	23.2
816	-17.7	-0.2	0.1	-0.2	-19.1	-19	-18.9	-18.3	23.5
817	-17.5	1.5	1.6	1.5	-19.6	-19.4	-19.2	-19.1	23.9
818	-16.9	2	2.2	2	-19.3	-19.2	-19.1	-18.9	24.2
819	-16.3	3.1	3.2	3.1	-19.8	-19.6	-19.4	-19.1	25.1
820	-16.1	4.3	4.5	4.3	-19.4	-19.3	-19.2	-18.8	25.3
821	-15.5	6.4	6.7	6.4	-19.7	-19.5	-19.3	-18.8	25.7
822	-14.9	8.2	8.3	8.2	-19.5	-19.4	-19.3	-18.7	25.9
823	-14	9.5	9.7	9.5	-19.7	-19.5	-19.3	-18.6	25.8
824	-13.7	11	11.3	11	-19.6	-19.5	-19.4	-18.6	26
825	-13.1	12.1	12.5	12.1	-19.6	-19.4	-19.2	-18.3	26.2
826	-12.9	12.3	12.6	12.3	-19.1	-19	-18.9	-17.9	26.5
827	-11.9	12.2	12.3	12.2	-19	-18.8	-18.6	-17.5	26.8
828	-11.3	12.7	12.9	12.7	-18.5	-18.4	-18.3	-18.2	27.3
829	-11.1	13.3	13.4	13.3	-18.3	-18.1	-17.9	-17.7	27.5
830	-10.9	14.1	14.3	14.1	-17.7	-17.6	-17.5	-17.2	27.9
831	-10	14.3	14.6	14.3	-17.5	-17.3	-17.1	-16.7	27.9
832	-9.1	14.6	14.7	14.6	-17.1	-17	-16.9	-16.4	28.1
833	-8.2	15.2	15.4	15.2	-16.6	-16.4	-16.2	-15.6	27.7
834	-7.3	15.6	15.9	15.6	-15.6	-15.5	-15.4	-14.7	28
835	-6.9	16	16.4	16	-15.4	-15.2	-15	-14.2	28.1
836	-5.7	16.2	16.5	16.2	-14.7	-14.6	-14.5	-13.6	28.3
837	-4.6	17.1	17.2	17.1	-14.4	-14.2	-14	-13	28.3
838	-3.9	18	18.2	18	-13.4	-13.3	-13.2	-12.1	28.3
839	-3	18.5	18.8	18.5	-13.4	-13.2	-13	-12	28.4
840	-4.5	18.9	19.2	18.9	-12.4	-12.3	-12.2	-11.3	27.9
841	-2.9	19.2	19.5	19.2	-12.2	-12	-11.8	-11	27.6
842	-1.8	19.4	19.7	19.4	-11.1	-11	-10.9	-10.8	27.6
843	-0.7	19.6	19.9	19.6	-10.8	-10.6	-10.4	-10.2	26.9
844	0.4	19.8	20.1	19.8	-10.5	-10.4	-10.3	-10	26.6
845	1.5	19.8	20.1	19.8	-10.6	-10.4	-10.2	-9.8	26.3
846	2	19.8	20.1	19.8	-9.3	-9.2	-9.1	-8.6	26
847	3.1	20.1	20.4	20.1	-8.4	-8.2	-8	-7.4	25.7
848	3.8	20.1	20.4	20.1	-7.4	-7.3	-7.2	-6.5	25.6
849	5.9	20	20.3	20	-6.8	-6.6	-6.4	-5.6	25
850	8	20.3	20.6	20.3	-6.3	-6.2	-6.1	-5.2	24.4
851	9	20.7	21	20.7	-5.1	-4.9	-4.7	-3.7	23.9
852	10.2	21	21.1	21	-3.9	-3.8	-3.7	-2.6	23.7
853	11.3	21.5	21.7	21.5	-3.6	-3.4	-3.2	-3.1	23.1
854	12.4	22	22.3	22	-2.3	-2.2	-2.1	-1.9	23
855	13.3	22.4	22.8	22.4	-3.8	-3.6	-3.4	-3.1	22.3
856	14	22.6	22.9	22.6	-2.1	-2	-1.9	-1.5	21.7
857	14.5	22.2	22.3	22.2	-1.3	-1.1	-0.9	-0.4	21.6
858	15	22.7	22.9	22.7	-0.1	8.32667e-17	0.1	0.7	20.9
859	16	22.9	23.2	22.9	0.7	0.9	1.1	1.8	20.5
860	16.3	22.7	22.8	22.7	2.2	2.3	2.4	3.2	20
861	16.6	22.7	22.9	22.7	2.7	2.9	3.1	4	19.5
862	16.9	22.7	23	22.7	3.9	4	4.1	5.1	18.9
863	17	22.9	23.3	22.9	4.3	4.5	4.7	5.8	18.1
864	17.1	22.6	22.9	22.6	6.5	6.6	6.7	7.7	17.2
865	17.2	22.1	22.2	22.1	8.3	8.5	8.7	9.6	16.9
866	18.2	21.9	22.1	21.9	9.7	9.8	9.9	10.7	16.6
867	18.8	21.5	21.6	21.5	10.9	11.1	11.3	12	16.3
868	19.3	21.3	21.5	21.3	12.1	12.2	12.3	12.9	15.6
869	19.5	21.1	21.4	21.1	12.2	12.4	12.6	13.1	14.7
870	19.7	20.6	20.7	20.6	12.5	12.8	13.1	13.6	13.8
871	20	20.4	20.6	20.4	12.9	13.3	13.7	13.8	13.1
872	20.2	20.2	20.5	20.2	13.8	14.3	14.8	15	12.6
873	20.4	19.8	20.2	19.8	14.5	15.1	15.7	16	11.7
874	20.6	19.6	19.9	19.6	14.8	15.5	16.2	16.6	11.2
875	21.2	19.1	19.2	19.1	15.3	16.1	16.9	17.4	10.7
876	21.8	19.1	19.3	19.1	16	16.1	16.2	16.8	10.2
877	22.4	18.5	18.6	18.5	15.5	15.7	15.9	16.6	9.7
878	23	18.3	18.5	18.3	16	16.1	16.2	17	9.6
879	23.6	17.8	18.1	17.8	16.1	16.2	16.3	17.2	9
880	23.7	17.2	17.3	17.2	17.3	17.4	17.5	18.5	8.4
881	23.5	16.9	17.1	16.9	18	18.1	18.2	19.3	7.8
882	23.3	16.6	16.9	16.6	18.5	18.6	18.7	18.8	7.4
883	23.6	16.3	16.7	16.3	18.8	18.9	19	19.2	6.6
884	23.5	15.8	16.1	15.8	19.2	19.3	19.4	19.7	5.5
885	23.3	15.2	15.3	15.2	19.3	19.4	19.5	19.9	4.4
886	23.3	14.9	15.1	14.9	19.6	19.7	19.8	20.3	3.3
887	23.3	14.6	14.7	14.6	19.7	19.8	19.9	20.5	2.7
888	23.3	14.5	14.7	14.5	19.8	19.9	20	20.7	2.1
889	22.1	14.4	14.7	14.4	19.7	19.8	19.9	20.7	1.3
890	21.9	14.3	14.7	14.3	20.1	20.2	20.3	21.2	0.7
891	21.5	14	14.3	14	20	20.2	20.4	21.4	0.3
892	19.8	13.6	13.7	13.6	20.1	20.2	20.3	21.4	0.1
893	19.4	13.4	13.6	13.4	20.2	20.4	20.6	21.6	-0.5
894	19	12.8	13.1	12.8	20.8	20.9	21	21.9	-0.7
895	18.6	11.9	12	11.9	21.1	21.3	21.5	22.3	-1.2
896	18.2	11.3	11.5	11.3	21.7	21.8	21.9	22.6	-1.7
897	17.8	10.7	11	10.7	21.9	22.1	22.3	22.9	-2.2
898	17.4	10.1	10.5	10.1	22.3	22.6	22.9	23.4	-2.4
899	17.3	9.5	9.8	9.5	22.7	23.1	23.5	24	-3.1
900	17.2	9.1	9.2	9.1	23.2	23.6	24	24.1	-3.8
901	16.7	8.9	9.1	8.9	23.4	23.8	24.2	24.4	-4.5
902	16.5	8.5	8.6	8.5	23.4	23.8	24.2	24.5	-5.3
903	17	8.3	8.5	8.3	23.1	23.5	23.9	24.3	-6.5
904	17	8.1	8.4	8.1	23.3	23.7	24.1	24.6	-7
905	16.7	7.6	7.7	7.6	22.7	23.1	23.5	24.1	-7.5
906	16.1	7.2	7.4	7.2	22.6	23	23.4	24.1	-8
907	15.8	7.1	7.4	7.1	22.4	22.8	23.2	24	-8.5
908	15.5	7	7.4	7	23.7	24.1	24.5	25.4	-9.3
909	15	6.6	6.9	6.6	23.8	24.2	24.6	25.6	-10.3
910	15	6.1	6.2	6.1	24	24.4	24.8	25.9	-11
911	14.5	5.9	6.1	5.9	24.2	24.6	25	25.1	-11.7
912	13	5.1	5.2	5.1	24.4	24.8	25.2	25.4	-12.2
913	13.5	4.7	4.9	4.7	24.4	24.8	25.2	25.5	-13.4
914	13.6	4.4	4.7	4.4	24.7	25.1	25.5	25.9	-13.9
915	13.3	3.8	3.9	3.8	24.8	25.2	25.6	26.1	-14.3
916	13	3.5	3.7	3.5	25.1	25.5	25.9	26.5	-15.1
917	12	3.2	3.5	3.2	25.4	25.8	26.2	26.9	-16
918	12.4	2.9	3.3	2.9	25.7	26.1	26.5	27.3	-16.6
919	12.1	2.4	2.7	2.4	25.9	26.3	26.7	27.6	-17.2
920	11.5	1.8	1.9	1.8	25.9	26.3	26.7	27.7	-18
921	11.5	1.7	1.9	1.7	25.9	26.3	26.7	27.8	-18.2
922	11.2	1.1	1.2	1.1	26.1	26.5	26.9	27.9	-18.4
923	10.9	1.2	1.4	1.2	25.9	26.3	26.7	27.6	-18.8
924	10.8	1.3	1.6	1.3	25.7	26.1	26.5	27.3	-18.9
925	10.3	1.2	1.6	1.2	26.2	26.6	27	27.7	-19
926	9.9	0.9	1.2	0.9	26.2	26.6	27	27.6	-18.9
927	9.7	0.5	0.6	0.5	26.2	26.6	27	27.5	-19
928	9	0.5	0.7	0.5	26	26.4	26.8	27.3	-18.8
929	8.3	0.4	0.7	0.4	26.2	26.6	27	27.5	-18.9
930	7.6	-0.1	0	-0.1	24.9	25.3	25.7	25.8	-19.1
931	6.9	-0.3	-0.1	-0.3	24.4	24.8	25.2	25.4	-19.2
932	6.2	-0.7	-0.4	-0.7	23.9	24.3	24.7	25	-19.2
933	5.5	-1	-0.6	-1	23.6	24	24.4	24.8	-18.9
934	4.8	-1.5	-1.2	-1.5	23.5	23.9	24.3	24.8	-18.5
935	4.1	-2.1	-2	-2.1	23.2	23.6	24	24.6	-18.5
936	3.4	-2.4	-2.2	-2.4	22.9	23.3	23.7	24.4	-18.8
937	2.7	-2.9	-2.8	-2.9	22.6	23	23.4	24.2	-18.6
938	2.5	-3.2	-3	-3.2	22.4	22.8	23.2	24.1	-18.5
939	1.8	-3.5	-3.2	-3.5	22	22.4	22.8	23.8	16.8
940	1	-4.1	-4	-4.1	21.7	22.1	22.5	23.6	17.2
941	0.2	-4.7	-4.5	-4.7	21.5	21.9	22.3	22.4	17.4
942	-1.2	-4.7	-4.4	-4.7	21.1	21.5	21.9	22.1	17.6
943	-2.1	-4.9	-4.5	-4.9	20.3	20.7	21.1	21.4	18.5
944	-3	-5.3	-5	-5.3	19.9	20.3	20.7	21.1	19.1
945	-3.6	-5.8	-5.7	-5.8	19.5	19.9	20.3	21.4	19.6
946	-4.2	-6	-5.8	-6	18.9	19.3	19.7	20.7	19.7
947	-4.8	-6.6	-6.5	-6.6	18.3	18.7	19.1	20	20
948	-5.4	-7	-6.8	-7	17.7	18.1	18.5	19.3	20.4
949	-6.3	-7.4	-7.1	-7.4	17.1	17.5	17.9	18.6	20.5
950	-7.2	-8.1	-8	-8.1	16.6	17	17.4	18	20.4
951	-7.8	-8.5	-8.3	-8.5	16.4	16.8	17.2	17.7	20.5
952	-8.4	-8.9	-8.6	-8.9	16.2	16.6	17	17.5	20.5
953	-9	-9.3	-8.9	-9.3	15.6	16	16.4	16.9	20.7
954	-9.6	-9.9	-9.6	-9.9	15	15.4	15.8	16.3	20.4
955	-10.5	-10.6	-10.5	-10.6	13.9	14.3	14.7	15.2	20.7
956	-11.4	-11	-10.8	-11	13.9	14.3	14.7	15.3	21.3
957	-12	-11.6	-11.5	-11.6	13.4	13.8	14.2	14.8	22.2
958	-12.6	-12	-11.8	-12	13.4	13.8	14.2	14.8	22.5
959	-13.2	-12.4	-12.1	-12.4	13	13.4	13.8	14.4	22.5
960	-14.1	-12.8	-12.4	-12.8	12.4	12.8	13.2	13.7	22.6
961	-14.7	-13.4	-13.1	-13.4	12.8	13.2	13.6	14.2	23.4
962	-15.2	-14.1	-14	-14.1	12.5	12.9	13.3	14	23.7
963	-16.1	-14.5	-14.3	-14.5	11.9	12.3	12.7	13.5	24.2
964	-17	-14.9	-14.6	-14.9	11.9	12.3	12.7	13.6	23.7
965	-17.6	-16	-15.9	-16	11.7	12.1	12.5	13.1	23.4
966	-18.2	-16.8	-16.6	-16.8	11.5	11.9	12.3	12.9	24
967	-18.8	-17.3	-17	-17.3	11.3	11.7	12.1	12.7	24.6
968	-19	-17.8	-17.4	-17.8	10.9	11.3	11.7	12.2	24.8
969	-18.9	-18.5	-18.2	-18.5	10.4	10.8	11.2	11.7	25
970	-19.1	-18.9	-18.8	-18.9	10.3	10.7	11.1	11.6	25.2
971	-19.2	-18.7	-18.5	-18.7	9.5	9.9	10.3	10.8	25.6
972	-19.5	-19	-18.9	-19	8.9	9.3	9.7	10.2	25.6
973	-19.4	-19	-18.8	-19	8.1	8.5	8.9	9.4	26.3
974	-19.7	-19.2	-18.9	-19.2	7.5	7.9	8.3	8.8	26.6
975	-19.5	-19.6	-19.5	-19.6	6.7	7.1	7.5	8	26.9
976	-19.6	-19.7	-19.5	-19.7	6.1	6.5	6.9	7.4	27.4
977	-19.6	-19.3	-19	-19.3	5.3	5.7	6.1	6.6	27.9
978	-19.7	-19.3	-18.9	-19.3	4.7	5.1	5.5	6	28.2
979	-19.7	-19.6	-19.3	-19.6	3.9	4.3	4.7	5.2	28.2
980	-19.7	-20.1	-20	-20.1	3.3	3.7	4.1	4.6	28
981	-19.2	-20.1	-19.9	-20.1	3	3.4	3.8	4.3	28.1
982	-18.7	-20.1	-20	-20.1	2.4	2.8	3.2	3.7	27.9
983	-18.5	-19.9	-19.7	-19.9	1.5	1.9	2.3	2.8	27.8
984	-18.2	-19.7	-19.4	-19.7	0.8	1.2	1.6	2.1	27.8
985	-17.9	-19.2	-19.1	-19.2	-0.7	-0.3	0.1	0.6	27.7
986	-17.6	-19.6	-19.4	-19.6	-1.5	-1.1	-0.7	-0.2	28
987	-17.2	-19.2	-18.9	-19.2	-2.5	-2.1	-1.7	-1.2	27.7
988	-16.3	-18.8	-18.4	-18.8	-3	-2.6	-2.2	-1.7	27.2
989	-15.6	-18.6	-18.3	-18.6	-3.7	-3.3	-2.9	-2.4	26.7
990	-15.3	-18.4	-18.3	-18.4	-4.2	-3.8	-3.4	-2.9	26.2
991	-14.9	-17.9	-17.7	-17.9	-4.9	-4.5	-4.1	-3.6	25.9
992	-14.5	-17.6	-17.5	-17.6	-5.7	-5.3	-4.9	-4.4	25.1
993	-13.5	-17.3	-17.1	-17.3	-6.7	-6.3	-5.9	-5.4	24.7
994	-13.1	-16.6	-16.3	-16.6	-7.2	-6.8	-6.4	-5.9	24.4
995	-12.4	-15.9	-15.5	-15.9	-7.9	-7.5	-7.1	-6.6	24.1
996	-12.1	-15.8	-15.5	-15.8	-8.4	-8	-7.6	-7.1	23.8
997	-11.3	-15.4	-15.3	-15.4	-9.1	-8.7	-8.3	-7.8	23.5
998	-10.6	-14.7	-14.5	-14.7	-9.9	-9.5	-9.1	-8.6	23
999	-10.6	-13.7	-13.4	-13.7	-10.9	-10.5	-10.1	-9.6	22.4
1000	-10.7	-13.6	-13.5	-13.6	-11.4	-11	-10.6	-10.1	22.1
1001	-9.4	-12.9	-12.7	-12.9	-12.1	-11.7	-11.3	-10.8	22
1002	-8.1	-12.6	-12.3	-12.6	-12.6	-12.2	-11.8	-11.3	21.5
1003	-7.4	-11.5	-11.1	-11.5	-13.6	-13.2	-12.8	-12.3	21.4
1004	-6.7	-11	-10.7	-11	-14.1	-13.7	-13.3	-12.8
1005	-6.5	-11	-10.9	-11	-14.7	-14.3	-13.9	-13.4
1006	-4.9	-10.7	-10.5	-10.7	-15.5	-15.1	-14.7	-14.2
1007	-3.7	-9.9	-9.8	-9.9	-16.5	-16.1	-15.7	-15.2
1008	-3	-8.9	-8.7	-8.9	-17	-16.6	-16.2	-15.7
1009	-2.2	-7.9	-7.6	-7.9	-17.7	-17.3	-16.9	-16.4
1010	-3.8	-7.2	-7.1	-7.2	-18.2	-17.8	-17.4	-17.3
1011	-2.6	-6.7	-6.5	-6.7	-18.5	-18.1	-17.7	-17.5
1012	-1.9	-5.4	-5.1	-5.4	-18.6	-18.2	-17.8	-17.5
1013	-1.2	-4.2	-3.8	-4.2	-18.9	-18.5	-18.1	-17.7
1014	-0.5	-3.6	-3.3	-3.6	-18.9	-18.5	-18.1	-17.6
1015	1.4	-2.9	-2.8	-2.9	-19.3	-18.9	-18.5	-17.9
1016	1.8	-4.3	-4.1	-4.3	-19.1	-18.7	-18.3	-17.6
1017	3	-2.8	-2.7	-2.8	-19.5	-19.1	-18.7	-17.9
1018	4.1	-1.6	-1.4	-1.6	-19.2	-18.8	-18.4	-17.5
1019	6.1	-0.4	-0.1	-0.4	-19.4	-19	-18.6	-17.6
1020	8.1	0.5	0.6	0.5	-19.3	-18.9	-18.5	-17.4
1021	9.3	1.7	1.9	1.7	-19.4	-19	-18.6	-18.5
1022	10.7	2.3	2.6	2.3	-19.4	-19	-18.6	-18.4
1023	11.7	3.5	3.9	3.5	-19.3	-18.9	-18.5	-18.2
1024	12	4.1	4.4	4.1	-18.9	-18.5	-18.1	-17.7
1025	12.1	6	6.1	6	-18.7	-18.3	-17.9	-17.4
1026	12.5	8.2	8.4	8.2	-18.3	-17.9	-17.5	-16.9
1027	13.2	9.1	9.2	9.1	-18	-17.6	-17.2	-16.5
1028	13.9	10.4	10.6	10.4	-17.5	-17.1	-16.7	-15.9
1029	14	11.6	11.9	11.6	-17.2	-16.8	-16.4	-15.5
1030	14.5	12.8	13.2	12.8	-16.9	-16.5	-16.1	-15.1
1031	15	13.6	13.9	13.6	-16.3	-15.9	-15.5	-14.4
1032	15.3	14.1	14.2	14.1	-15.4	-15	-14.6	-13.6
1033	15.6	14.7	14.9	14.7	-15.1	-14.7	-14.3	-13.4
1034	15.9	15.3	15.6	15.3	-14.5	-14.1	-13.7	-12.9
1035	17	16.1	16.2	16.1	-14.1	-13.7	-13.3	-12.6
1036	17.8	16.5	16.7	16.5	-13.2	-12.8	-12.4	-11.8
1037	18.2	16.9	17.2	16.9	-13.1	-12.7	-12.3	-11.8
1038	18.6	17.3	17.7	17.3	-12.2	-11.8	-11.4	-10.9
1039	18.9	17.3	17.6	17.3	-11.9	-11.5	-11.1	-10.6
1040	19.1	17.2	17.3	17.2	-10.9	-10.5	-10.1	-10
1041	19.3	17.4	17.6	17.4	-10.5	-10.1	-9.7	-9.5
1042	19.5	18.3	18.4	18.3	-10.3	-9.9	-9.5	-9.2
1043	19.5	19	19.2	19	-10.3	-9.9	-9.5	-9.1
1044	19.5	19.9	20.2	19.9	-9.1	-8.7	-8.3	-7.8
1045	19.8	19.9	20	19.9	-8.1	-7.7	-7.3	-6.7
1046	19.8	20.2	20.4	20.2	-7.2	-6.8	-6.4	-5.7
1047	19.7	20.6	20.9	20.6	-6.5	-6.1	-5.7	-4.9
1048	20	20.9	21.3	20.9	-6.1	-5.7	-5.3	-4.4
1049	20.4	21	21.3	21	-4.8	-4.4	-4	-3
1050	20.9	21	21.1	21	-3.7	-3.3	-2.9	-1.8
1051	21.3	21.7	21.9	21.7	-3.3	-2.9	-2.5	-2.4
1052	21.7	22.2	22.3	22.2	-2.1	-1.7	-1.3	-1.1
1053	22	22.8	23	22.8	-3.5	-3.1	-2.7	-2.4
1054	22.3	23.6	23.9	23.6	-1.9	-1.5	-1.1	-0.7
1055	22.1	23.8	23.9	23.8	-1	-0.6	-0.2	0.3
1056	22.5	24.2	24.4	24.2	0.1	0.5	0.9	1.5
1057	22.6	24.3	24.6	24.3	1	1.4	1.8	2.5
1058	22.6	24.1	24.5	24.1	2.4	2.8	3.2	4
1059	22.5	24.2	24.5	24.2	3	3.4	3.8	4.7
1060	22.4	23.8	23.9	23.8	4.1	4.5	4.9	5.9
1061	22.5	23.6	23.8	23.6	4.6	5	5.4	6.5
1062	22.3	23.7	23.8	23.7	6.7	7.1	7.5	8.5
1063	22	23.7	23.9	23.7	8.6	9	9.4	10.3
1064	21.7	23.1	23.4	23.1	9.9	10.3	10.7	11.5
1065	21.4	22.9	23.3	22.9	11.2	11.6	12	12.7
1066	21.1	22.6	22.9	22.6	12.3	12.7	13.1	13.7
1067	20.8	22.1	22.2	22.1	12.5	12.9	13.3	13.8
1068	20.5	21.9	22.1	21.9	12.7	13.1	13.5	14
1069	20.2	21.7	22	21.7	13	13.4	13.8	14.3
1070	19.9	21.2	21.3	21.2	13.8	14.2	14.6	14.7
1071	19.4	21	21.2	21	14.4	14.8	15.2	15.4
1072	19.3	20.8	21.1	20.8	14.6	15	15.4	15.7
1073	19	20.6	21	20.6	15	15.4	15.8	16.2
1074	18.9	20.2	20.5	20.2	15.6	16	16.4	16.9
1075	18.4	19.5	19.6	19.5	15.8	16.2	16.6	17.2
1076	18.1	19.5	19.7	19.5	16.2	16.6	17	17.7
1077	17.5	19.1	19.2	19.1	16.4	16.8	17.2	18
1078	17.1	19.1	19.3	19.1	17.6	18	18.4	19.3
1079	16.7	18.7	19	18.7	18.3	18.7	19.1	20.1
1080	16.3	18.2	18.3	18.2	18.8	19.1	19.4	20.5
1081	15.9	17.7	17.9	17.7	19	19.2	19.4	19.5
1082	15.5	17.4	17.7	17.4	19.3	19.6	19.9	20.1
1083	15.1	17.1	17.5	17.1	19.5	19.9	20.3	20.6
1084	14.7	16.6	16.9	16.6	19.9	20.4	20.9	21.3
1085	14.5	16	16.1	16	20.1	20.7	21.3	21.8
1086	14.3	15.7	15.9	15.7	20.3	21	21.7	22.3
1087	14.1	15.2	15.3	15.2	20.3	21.1	21.9	22.6
1088	13.9	14.9	15.1	14.9	20.8	21.7	22.6	23.4
1089	13.7	14.8	15.1	14.8	20.8	20.9	21	21.9
1090	13.5	14.4	14.5	14.4	20	20.2	20.4	21.4
1091	13.2	14.3	14.5	14.3	20.3	20.4	20.5	21.6
1092	12.5	14.2	14.5	14.2	20.7	20.9	21.1	22.1
1093	11.8	14.1	14.5	14.1	21.2	21.3	21.4	22.3
1094	11.1	13.8	14.1	13.8	21.6	21.8	22	22.8
1095	10.4	13.3	13.4	13.3	22	22.1	22.2	22.3
1096	9.7	12.7	12.9	12.7	22.2	22.4	22.6	22.8
1097	9.2	12.1	12.4	12.1	22.6	22.7	22.8	23.1
1098	9	11.4	11.7	11.4	22.9	23.1	23.3	23.7
1099	8.7	10.7	11	10.7	23.2	23.3	23.4	23.9
1100	8.4	10	10.3	10	23.1	23.3	23.5	24.1
1101	8.1	9.5	9.8	9.5	22.9	23	23.1	23.8
1102	7.8	9.3	9.6	9.3	23	23.2	23.4	24.2
1103	7.5	9	9.3	9	22.5	22.6	22.7	23.6
1104	7	8.7	9	8.7	22.3	22.5	22.7	23.7
1105	6.8	8.4	8.7	8.4	22.2	22.3	22.4	23.5
1106	6.6	8.1	8.4	8.1	23.4	23.6	23.8	23.9
1107	6.3	7.8	8.1	7.8	23.6	23.7	23.8	24
1108	6	7.3	7.6	7.3	23.7	23.9	24.1	24.4
1109	5.7	7.1	7.4	7.1	24	24.1	24.2	24.6
1110	5	6.7	6.8	6.7	24.1	24.3	24.5	25
1111	4.5	6.5	6.7	6.5	24.2	24.3	24.4	25
1112	4.1	6.3	6.6	6.3	24.4	24.6	24.8	25.5
1113	3.7	6.1	6.5	6.1	24.6	24.7	24.8	25.6
1114	3.3	5.3	5.6	5.3	24.8	25	25.2	26.1
1115	2.9	4.6	4.7	4.6	25.2	25.3	25.4	26.4
1116	2.5	4.3	4.5	4.3	25.4	25.6	25.8	26.9
1117	2.1	4	4.3	4	25.7	25.8	25.9	26.9
1118	1.7	3.4	3.5	3.4	25.6	25.8	26	26.9
1119	1.5	3.1	3.3	3.1	25.7	25.8	25.9	26.7
1120	1	2.8	3.1	2.8	25.8	26	26.2	26.9
1121	1	2.5	2.9	2.5	25.7	25.8	25.9	26.5
1122	1	2	2.3	2	25.7	25.9	26.1	26.6
1123	0.8	1.6	1.7	1.6	24.7	24.8	24.9	25.4
1124	0.6	1.2	1.4	1.2	24.1	24.3	24.5	24.6
1125	0.4	1.1	1.2	1.1	23.7	23.8	23.9	24.1
1126	0.3	1.2	1.4	1.2	23.3	23.5	23.7	24
1127	0.1	1.1	1.4	1.1	23.3	23.4	23.5	23.9
1128	-0.2	0.7	0.8	0.7	22.9	23.1	23.3	23.8
1129	-0.5	0.6	0.8	0.6	22.7	22.8	22.9	23.5
1130	-1	0.6	0.9	0.6	22.3	22.5	22.7	23.4
1131	-1.4	0.5	0.9	0.5	22.2	22.3	22.4	23.2
1132	-1.8	0.1	0.4	0.1	21.7	21.9	22.1	23
1133	-2.2	-0.4	-0.3	-0.4	21.5	21.6	21.7	22.7
1134	-2.6	-0.8	-0.6	-0.8	21.2	21.4	21.6	22.7
1135	-3	-1.3	-1.2	-1.3	20.9	21	21.1	21.2
1136	-3.4	-1.6	-1.4	-1.6	20	20.2	20.4	20.6
1137	-3.8	-1.9	-1.6	-1.9	19.7	19.8	19.9	20.2
1138	-4.2	-2.5	-2.4	-2.5	19.2	19.4	19.6	20
1139	-4.9	-2.8	-2.6	-2.8	18.7	18.8	18.9	19.4
1140	-5	-3.1	-2.8	-3.1	18	18.2	18.4	19
1141	-5.3	-3.4	-3	-3.4	17.5	17.6	17.7	18.4
1142	-5.6	-3.9	-3.6	-3.9	16.8	17	17.2	18
1143	-5.9	-4.8	-4.7	-4.8	16.4	16.5	16.6	17.5
1144	-6.2	-4.8	-4.6	-4.8	16.1	16.3	16.5	17.5
1145	-6.7	-5.2	-5.1	-5.2	16	16.1	16.2	17.3
1146	-7.2	-5.4	-5.2	-5.4	15.3	15.5	15.7	16.7
1147	-7.7	-5.6	-5.3	-5.6	14.8	14.9	15	15.9
1148	-8.2	-5.8	-5.4	-5.8	13.6	13.8	14	14.8
1149	-8.7	-6.4	-6.1	-6.4	13.7	13.8	13.9	14.6
1150	-9.2	-7.1	-7	-7.1	13.1	13.3	13.5	14.1
1151	-9.7	-7.5	-7.3	-7.5	13.2	13.3	13.4	13.9
1152	-10.2	-7.9	-7.6	-7.9	12.7	12.9	13.1	13.6
1153	-10.7	-8.6	-8.5	-8.6	12.2	12.3	12.4	12.5
1154	-11.2	-9	-8.8	-9	12.5	12.7	12.9	13.1
1155	-11.7	-9.4	-9.1	-9.4	12.3	12.4	12.5	12.8
1156	-12.2	-9.8	-9.4	-9.8	11.6	11.8	12	12.4
1157	-12.7	-10.4	-10.1	-10.4	11.7	11.8	11.9	12.4
1158	-13.2	-11.1	-11	-11.1	11.4	11.6	11.8	12.4
1159	-13.7	-11.5	-11.3	-11.5	11.3	11.4	11.5	12.2
1160	-14.2	-12.1	-12	-12.1	11	11.2	11.4	12.2
1161	-14.7	-12.5	-12.3	-12.5	10.7	10.8	10.9	11.8
1162	-15.2	-12.9	-12.6	-12.9	10.1	10.3	10.5	11.5
1163	-16.1	-13.6	-13.5	-13.6	10.1	10.2	10.3	11.4
1164	-17	-14	-13.8	-14	9.2	9.4	9.6	9.7
1165	-17.6	-14.4	-14.1	-14.4	8.7	8.8	8.9	9.1
1166	-18.2	-14.8	-14.4	-14.8	7.8	8	8.2	8.5
1167	-18.8	-15.8	-15.5	-15.8	7.3	7.4	7.5	7.9
1168	-19	-16.9	-16.8	-16.9	6.4	6.6	6.8	7.3
1169	-18.9	-17.4	-17.2	-17.4	5.9	6	6.1	6.7
1170	-19.1	-18.1	-18	-18.1	5	5.2	5.4	6.1
1171	-19.2	-18.6	-18.4	-18.6	4.5	4.6	4.7	5.5
1172	-19.5	-18.7	-18.4	-18.7	3.6	3.8	4	4.9
1173	-19.7	-18.8	-18.7	-18.8	3.1	3.2	3.3	4.3
1174	-19.9	-18.9	-18.7	-18.9	2.7	2.9	3.1	4.2
1175	-19.6	-18.9	-18.6	-18.9	2.2	2.3	2.4	3.4
1176	-19.7	-19.1	-18.7	-19.1	1.2	1.4	1.6	2.5
1177	-19.9	-19.4	-19.1	-19.4	0.6	0.7	0.8	1.6
1178	-20.2	-19.8	-19.7	-19.8	-1	-0.8	-0.6	0.1
1179	-20.3	-19.4	-19.2	-19.4	-1.7	-1.6	-1.5	-0.9
1180	-20.2	-19.6	-19.5	-19.6	-2.8	-2.6	-2.4	-1.9
1181	-20.1	-19.7	-19.5	-19.7	-3.2	-3.1	-3	-2.5
1182	-20	-19.9	-19.6	-19.9	-4	-3.8	-3.6	-3.1
1183	-19.3	-19.9	-19.5	-19.9	-4.4	-4.3	-4.2	-4.1
1184	-19.8	-19.9	-19.6	-19.9	-5.2	-5	-4.8	-4.6
1185	-19.5	-20	-19.9	-20	-5.9	-5.8	-5.7	-5.4
1186	-19.2	-19.8	-19.6	-19.8	-7	-6.8	-6.6	-6.2
1187	-18.9	-19	-18.7	-19	-7.4	-7.3	-7.2	-6.7
1188	-18.5	-19.7	-19.6	-19.7	-8.2	-8	-7.8	-7.2
1189	-18.1	-19.3	-19.1	-19.3	-8.6	-8.5	-8.4	-7.7
1190	-17.7	-18.9	-18.6	-18.9	-9.4	-9.2	-9	-8.2
1191	-17.5	-18.5	-18.1	-18.5	-10.1	-10	-9.9	-9
1192	-16.9	-18.2	-17.9	-18.2	-11.2	-11	-10.8	-9.8
1193	-16.3	-18	-17.9	-18	-11.6	-11.5	-11.4	-10.3
1194	-16.1	-17.5	-17.3	-17.5	-12.4	-12.2	-12	-11.9
1195	-15.5	-17.4	-17.3	-17.4	-12.8	-12.7	-12.6	-12.4
1196	-14.9	-16.7	-16.5	-16.7	-13.9	-13.7	-13.5	-13.2
1197	-14	-16	-15.7	-16	-14.3	-14.2	-14.1	-13.7
1198	-13.7	-16	-15.9	-16	-15	-14.8	-14.6	-14.1
1199	-13.1	-15.3	-15.1	-15.3	-15.7	-15.6	-15.5	-14.9
1200	-12.9	-14.6	-14.3	-14.6	-16.8	-16.6	-16.4	-16.1
1201	-11.9	-13.6	-13.2	-13.6	-17.2	-17.1	-17	-16.6
1202	-11.3	-13.4	-13.1	-13.4	-18	-17.8	-17.6	-17.1
1203	-11.1	-13	-12.9	-13	-18.4	-18.3	-18.2	-17.6
1204	-10.9	-12.7	-12.5	-12.7	-18.8	-18.6	-18.4	-17.7
1205	-10	-11.8	-11.7	-11.8	-18.8	-18.7	-18.6	-17.8
1206	-9.1	-11.1	-10.9	-11.1	-19.2	-19	-18.8	-17.9
1207	-8.2	-10.8	-10.5	-10.8	-19.1	-19	-18.9	-18.1
1208	-7.3	-10.8	-10.7	-10.8	-19.6	-19.4	-19.2	-18.5
1209	-6.9	-9.8	-9.6	-9.8	-19.3	-19.2	-19.1	-18.5
1210	-5.7	-8.8	-8.5	-8.8	-19.8	-19.6	-19.4	-18.9
1211	-4.6	-7.8	-7.4	-7.8	-19.4	-19.3	-19.2	-18.9
1212	-3.9	-7	-6.7	-7	-19.7	-19.5	-19.3	-18.9
1213	-3	-6.8	-6.7	-6.8	-19.5	-19.4	-19.3	-18.8
1214	-4.5	-5.5	-5.3	-5.5	-19.7	-19.5	-19.3	-18.7
1215	-2.9	-4.5	-4.4	-4.5	-19.6	-19.3	-19	-18.3
1216	-1.8	-3.7	-3.5	-3.7	-19.4	-19	-18.6	-17.8
1217	-0.7	-2.7	-2.4	-2.7	-18.9	-18.4	-17.9	-17
1218	0.4	-4.1	-3.7	-4.1	-18.6	-18	-17.4	-17.3
1219	1.5	-2.6	-2.3	-2.6	-18.1	-17.4	-16.7	-16.5
1220	2	-1.7	-1.6	-1.7	-17.7	-16.9	-16.1	-15.8
1221	3.1	-0.5	-0.3	-0.5	-17.1	-17	-16.9	-16.5
1222	3.8	0.7	1	0.7	-17.5	-17.3	-17.1	-16.6
1223	5.9	1.6	1.7	1.6	-17.1	-17	-16.9	-16.3
1224	8	2.2	2.4	2.2	-16.6	-16.5	-16.4	-15.7
1225	9	3.7	4	3.7	-15.7	-15.6	-15.5	-14.7
1226	10.2	4.5	4.9	4.5	-15.4	-15.3	-15.2	-14.3
1227	11.3	6.5	6.8	6.5	-14.8	-14.7	-14.6	-13.6
1228	12.4	8.4	8.5	8.4	-14.4	-14.3	-14.2	-13.1
1229	13.3	9.5	9.7	9.5	-13.5	-13.4	-13.3	-13.2
1230	14	10.6	10.7	10.6	-13.4	-13.3	-13.2	-13
1231	14.5	11.8	12	11.8	-12.5	-12.4	-12.3	-12
1232	15	12.9	13.2	12.9	-12.2	-12.1	-12	-11.6
1233	16	13.7	13.8	13.7	-11.2	-11.1	-11	-10.5
1234	16.3	14.3	14.5	14.3	-10.8	-10.7	-10.6	-10
1235	16.6	15.1	15.4	15.1	-10.6	-10.5	-10.4	-9.7
1236	16.9	15.9	16.3	15.9	-10.6	-10.4	-10.2	-9.4
1237	17	16.7	17	16.7	-9.3	-9.2	-9.1	-8.2
1238	17.1	16.7	16.8	16.7	-8.4	-8.2	-8	-7
1239	17.2	17	17.2	17	-7.4	-7.3	-7.2	-6.1
1240	18.2	17.1	17.2	17.1	-6.8	-6.6	-6.4	-5.4
1241	18.8	17.5	17.7	17.5	-6.3	-6.2	-6.1	-5.2
1242	19.6	18.3	18.6	18.3	-5.1	-4.9	-4.7	-3.9
1243	19.8	18.5	18.6	18.5	-3.9	-3.6	-3.3	-2.6
1244	20	19.1	19.3	19.1	-3.4	-3	-2.6	-2
1245	20.3	19.4	19.7	19.4	-2.1	-1.7	-1.3	-0.8
1246	20.5	19.6	20	19.6	-3.5	-3.1	-2.7	-2.2
1247	20.7	19.9	20.2	19.9	-1.9	-1.5	-1.1	-0.6
1248	20.9	20.1	20.2	20.1	-1	-0.6	-0.2	0.3
1249	21.5	20.1	20.3	20.1	0.1	0.5	0.9	1.4
1250	22.1	19.9	20	19.9	1	1.4	1.8	2.4
1251	22.6	20.2	20.4	20.2	2.4	2.7	3	3.6
1252	23.3	20.5	20.8	20.5	3	3.4	3.8	4.4
1253	23.7	20.4	20.8	20.4	4.1	4.5	4.9	5.5
1254	24	20.4	20.7	20.4	4.6	4.9	5.2	5.8
1255	24	20.8	20.9	20.8	6.7	7	7.3	7.9
1256	23.7	21.6	21.8	21.6	8.6	8.9	9.2	9.8
1257	23.9	22	22.3	22	9.9	10.2	10.5	11.1
1258	23.7	22.1	22.2	22.1	11.2	11.5	11.8	12.4
1259	23.4	22.3	22.5	22.3	12.3	12.6	12.9	13.5
1260	23.6	23	23.3	23	12.5	12.8	13.1	13.6
1261	23.5	23.6	24	23.6	12.7	13	13.3	13.8
1262	22.8	24	24.3	24	13	13.3	13.6	14.2
1263	22.5	23.4	23.5	23.4	13.8	14.1	14.4	15
1264	22.3	23	23.2	23	14.4	14.7	15	15.6
1265	22	22.7	22.8	22.7	14.6	14.9	15.2	15.8
1266	21.7	22	22.2	22	15	15.3	15.6	16.2
1267	21.4	21.6	21.9	21.6	15.6	15.9	16.2	16.8
1268	21.1	20.8	20.9	20.8	15.8	16.1	16.4	17
1269	20.8	21.4	21.6	21.4	16.2	16.5	16.8	17.4
1270	20.5	20.7	21	20.7	16.4	16.7	17	17.6
1271	20.2	20.9	21.3	20.9	17.3	17.6	17.9	18.4
1272	19.9	21	21.3	21	18.1	18.4	18.7	19.2
1273	19.4	20.3	20.4	20.3	18.5	18.8	19.1	19.6
1274	19.3	19.7	19.9	19.7	18.9	19.2	19.5	20
1275	19	19.2	19.3	19.2	19.2	19.5	19.8	20.3
1276	18.9	19.1	19.3	19.1	19.4	19.7	20	20.5
1277	18.4	18.7	19	18.7	19.6	19.9	20.2	20.7
1278	18.1	18.2	18.3	18.2	19.8	20.1	20.4	20.9
1279	17.5	17.7	17.9	17.7	19.8	20	20.2	20.7
1280	17.1	17.4	17.7	17.4	19.8	19.9	20	20.5
1281	16.7	17.1	17.5	17.1	20.1	20.3	20.5	21
1282	16.3	16.6	16.9	16.6	20.1	20.2	20.3	20.8
1283	15.9	16	16.1	16	20	20.2	20.4	20.9
1284	15.5	15.7	15.9	15.7	20.3	20.4	20.5	21
1285	15.1	15.2	15.3	15.2	20.7	20.9	21.1	21.6
1286	14.7	14.9	15.1	14.9	21.2	21.3	21.4	21.9
1287	14.5	14.8	15.1	14.8	21.6	21.8	22	22.5
1288	14.3	14.7	15.1	14.7	22	22.1	22.2	22.7
1289	14.1	14.4	14.7	14.4	22.2	22.4	22.6	23.1
1290	13.9	14	14.1	14	22.6	22.7	22.8	23.3
1291	13.7	13.9	14.1	13.9	22.9	23.1	23.3	23.8
1292	13.5	13.8	14.1	13.8	23.2	23.3	23.4	23.9
1293	13.2	13.3	13.4	13.3	23.1	23.3	23.5	24
1294	12.5	12.7	12.9	12.7	22.9	23	23.1	23.6
1295	11.8	12.1	12.4	12.1	23	23.2	23.4	23.9
1296	11.1	11.5	11.9	11.5	22.5	22.6	22.7	23.2
1297	10.4	10.7	11	10.7	22.3	22.5	22.7	23.2
1298	9.7	9.8	9.9	9.8	22.2	22.3	22.4	22.9
1299	9.2	9.4	9.6	9.4	23.4	23.6	23.8	24.3
1300	9	9.1	9.2	9.1	23.6	23.7	23.8	24.3
1301	8.7	8.9	9.1	8.9	23.7	23.9	24.1	24.6
1302	8.4	8.7	9	8.7	24	24.1	24.2	24.7
1303	8.1	8.2	8.3	8.2	24.1	24.3	24.5	25
1304	7.8	8	8.2	8	24.2	24.3	24.4	24.9
1305	7.5	7.8	8.1	7.8	24.4	24.6	24.8	25.3
1306	7	7.4	7.8	7.4	24.6	24.7	24.8	25.3
1307	6.8	7.1	7.4	7.1	24.8	25	25.2	25.7
1308	6.6	6.7	6.8	6.7	25.2	25.3	25.4	25.9
1309	6.3	6.5	6.7	6.5	25.4	25.6	25.8	26.3
1310	6	6.1	6.2	6.1	25.7	25.8	25.9	26.4
1311	5.7	5.9	6.1	5.9	25.6	25.8	26	26.5
1312	5	5.3	5.6	5.3	25.7	25.8	25.9	26.4
1313	4.5	4.6	4.7	4.6	25.8	26	26.2	26.3
1314	4.1	4.3	4.5	4.3	25.7	25.8	25.9	26.1
1315	3.7	4	4.3	4	25.4	25.6	25.8	26.1
1316	3.3	3.7	4.1	3.7	26	26.1	26.2	26.6
1317	2.9	3.2	3.5	3.2	25.9	26.1	26.3	26.8
1318	2.5	2.6	2.7	2.6	26	26.1	26.2	26.8
1319	2.1	2.3	2.5	2.3	25.9	26.1	26.3	27
1320	1.7	1.8	1.9	1.8	26	26.1	26.2	27
1321	1.5	1.7	1.9	1.7	24.6	24.8	25	25.9
1322	1	1.3	1.6	1.3	24.2	24.3	24.4	25.4
1323	1	1.4	1.8	1.4	23.6	23.8	24	25.1
1324	1	1.3	1.6	1.3	23.4	23.5	23.6	23.7
1325	0.8	0.9	1	0.9	23.2	23.4	23.6	23.8
1326	0.6	0.8	1	0.8	23	23.1	23.2	23.5
1327	0.4	0.7	1	0.7	22.6	22.8	23	23.4
1328	0.3	0.4	0.5	0.4	22.4	22.5	22.6	23.1
1329	0.1	0.3	0.5	0.3	22.1	22.3	22.5	23.1
1330	-0.2	0.1	0.4	0.1	21.8	21.9	22	22.7
1331	-0.5	-0.1	0.3	-0.1	21.4	21.6	21.8	22.6
1332	-1	-0.7	-0.4	-0.7	21.3	21.4	21.5	22.4
1333	-1.4	-1.3	-1.2	-1.3	20.8	21	21.2	22.2
1334	-1.8	-1.6	-1.4	-1.6	20.1	20.2	20.3	21.4
1335	-2.2	-2.1	-2	-2.1	19.6	19.8	20	21
1336	-2.6	-2.4	-2.2	-2.4	19.3	19.4	19.5	20.4
1337	-3	-2.7	-2.4	-2.7	18.6	18.8	19	19.8
1338	-3.4	-3.3	-3.2	-3.3	18.1	18.2	18.3	19
1339	-3.8	-3.6	-3.4	-3.6	17.4	17.6	17.8	18.4
1340	-4.2	-3.9	-3.6	-3.9	16.9	17	17.1	17.6
1341	-4.9	-4.5	-4.1	-4.5	16.3	16.5	16.7	17.2
1342	-5	-4.7	-4.4	-4.7	16.2	16.3	16.4	16.9
1343	-5.3	-5.2	-5.1	-5.2	15.9	16.1	16.3	16.4
1344	-5.6	-5.4	-5.2	-5.4	15.4	15.5	15.6	15.8
1345	-5.9	-5.8	-5.7	-5.8	14.7	14.9	15.1	15.4
1346	-6.2	-6	-5.8	-6	13.7	13.8	13.9	14.3
1347	-6.7	-6.4	-6.1	-6.4	13.6	13.8	14	14.5
1348	-7.2	-7.1	-7	-7.1	13.2	13.3	13.4	14
1349	-7.7	-7.5	-7.3	-7.5	13.1	13.3	13.5	14.2
1350	-8.2	-7.9	-7.6	-7.9	12.8	12.9	13	13.8
1351	-8.7	-8.3	-7.9	-8.3	12.1	12.3	12.5	13.4
1352	-9.2	-8.9	-8.6	-8.9	12.6	12.7	12.8	13.8
1353	-9.7	-9.6	-9.5	-9.6	12.2	12.4	12.6	13.7
1354	-10.2	-10	-9.8	-10	11.7	11.8	11.9	12
1355	-10.7	-10.4	-10.1	-10.4	11.6	11.8	12	12.2
1356	-11.2	-10.9	-10.6	-10.9	11.5	11.6	11.7	12
1357	-11.7	-11.4	-11.1	-11.4	11.2	11.4	11.6	12
1358	-12.2	-11.9	-11.6	-11.9	11.1	11.2	11.3	11.8
1359	-12.7	-12.4	-12.1	-12.4	10.6	10.8	11	11.6
1360	-13.2	-12.9	-12.6	-12.9	10.2	10.3	10.4	11.1
1361	-13.7	-13.4	-13.1	-13.4	10	10.2	10.4	11.2
1362	-14.2	-13.9	-13.6	-13.9	9.3	9.4	9.5	10.4
1363	-14.7	-14.4	-14.1	-14.4	8.6	8.8	9	10
1364	-15.2	-14.9	-14.6	-14.9	7.9	8	8.1	9.2
1365	-16.1	-15.8	-15.5	-15.8	7.2	7.4	7.6	8.6
1366	-17	-16.7	-16.4	-16.7	6.5	6.6	6.7	7.6
1367	-17.6	-17.3	-17	-17.3	5.8	6	6.2	7
1368	-18.2	-18.1	-18	-18.1	5.1	5.2	5.3	6
1369	-18.8	-18.6	-18.4	-18.6	4.4	4.6	4.8	5.4
1370	-19	-18.7	-18.4	-18.7	3.7	3.8	3.9	4.4
1371	-18.9	-18.5	-18.1	-18.5	3	3.2	3.4	3.9
1372	-19.1	-18.8	-18.5	-18.8	2.8	2.9	3	3.5
1373	-19.2	-19.1	-19	-19.1	2.1	2.3	2.5	2.6
1374	-19.5	-19.3	-19.1	-19.3	1.3	1.4	1.5	1.7
1375	-19.7	-19.4	-19.1	-19.4	0.5	0.7	0.9	1.2
1376	-19.9	-19.8	-19.7	-19.8	-0.9	-0.8	-0.7	-0.3
1377	-19.6	-19.4	-19.2	-19.4	-1.8	-1.6	-1.4	-0.9
1378	-19.7	-19.4	-19.1	-19.4	-2.7	-2.6	-2.5	-1.9
1379	-19.9	-19.5	-19.1	-19.5	-3.3	-3.1	-2.9	-2.2
1380	-20.2	-19.9	-19.6	-19.9	-3.9	-3.8	-3.7	-2.9
1381	-20.3	-20.2	-20.1	-20.2	-4.5	-4.3	-4.1	-3.2
1382	-20.2	-20	-19.8	-20	-5.1	-5	-4.9	-3.9
1383	-20.1	-20	-19.9	-20	-6	-5.8	-5.6	-4.5
1384	-20	-19.8	-19.6	-19.8	-6.9	-6.8	-6.7	-6.6
1385	-19.3	-19	-18.7	-19	-7.5	-7.3	-7.1	-6.9
1386	-19.8	-19.7	-19.6	-19.7	-8.1	-8	-7.9	-7.6
1387	-19.5	-19.3	-19.1	-19.3	-8.7	-8.5	-8.3	-7.9
1388	-19.2	-18.9	-18.6	-18.9	-9.3	-9.2	-9.1	-8.6
1389	-18.9	-18.5	-18.1	-18.5	-10.2	-10	-9.8	-9.2
1390	-18.5	-18.2	-17.9	-18.2	-11.1	-11	-10.9	-10.2
1391	-18.1	-18	-17.9	-18	-11.7	-11.5	-11.3	-10.5
1392	-17.7	-17.5	-17.3	-17.5	-12.3	-12.2	-12.1	-11.2
1393	-17.5	-17.4	-17.3	-17.4	-12.9	-12.7	-12.5	-11.5
1394	-16.9	-16.7	-16.5	-16.7	-13.8	-13.7	-13.6	-12.5
1395	-16.3	-16	-15.7	-16	-14.4	-14.2	-14	-13
1396	-16.1	-16	-15.9	-16	-14.9	-14.8	-14.7	-13.8
1397	-15.5	-15.3	-15.1	-15.3	-15.8	-15.6	-15.4	-14.6
1398	-14.9	-14.6	-14.3	-14.6	-16.7	-16.6	-16.5	-16.4
1399	-14	-13.6	-13.2	-13.6	-17.3	-17.1	-16.9	-16.7
1400	-13.7	-13.4	-13.1	-13.4	-17.9	-17.8	-17.7	-17.4
1401	-13.1	-13	-12.9	-13	-18.5	-18.3	-18.1	-17.7
1402	-12.9	-12.7	-12.5	-12.7	-18.7	-18.6	-18.5	-18
1403	-11.9	-11.8	-11.7	-11.8	-18.9	-18.7	-18.5	-17.9
1404	-11.3	-11.1	-10.9	-11.1	-19.1	-19	-18.9	-18.2
1405	-11.1	-10.8	-10.5	-10.8	-19.2	-19	-18.8	-18
1406	-10.9	-10.5	-10.1	-10.5	-19.5	-19.4	-19.3	-18.4
1407	-10	-9.7	-9.4	-9.7	-19.4	-19.2	-19	-18
1408	-9.1	-9	-8.9	-9	-19.7	-19.6	-19.5	-18.4
1409	-8.2	-8	-7.8	-8	-19.5	-19.3	-19.1	-19
1410	-7.3	-7	-6.7	-7	-19.6	-19.5	-19.4	-19.2
1411	-6.9	-6.8	-6.7	-6.8	-19.6	-19.4	-19.2	-18.9
1412	-5.7	-5.5	-5.3	-5.5	-19.6	-19.3	-19	-18.6
1413	-4.6	-4.3	-4	-4.3	-19.5	-19.1	-18.7	-18.2
1414	-3.9	-3.5	-3.1	-3.5	-19.3	-18.8	-18.3	-17.7
1415	-3	-2.7	-2.4	-2.7	-18.8	-18.2	-17.6	-16.9
1416	-4.5	-4.4	-4.3	-4.4	-18.5	-17.8	-17.1	-16.3
1417	-2.9	-2.7	-2.5	-2.7	-18	-17.2	-16.4	-15.5
1418	-1.8	-1.7	-1.6	-1.7	-17.6	-17.5	-17.4	-16.4
1419	-0.7	-0.5	-0.3	-0.5	-17.8	-17.6	-17.4	-16.3
1420	0.4	0.7	1	0.7	-17.4	-17.3	-17.2	-16.2
1421	1.5	1.6	1.7	1.6	-17.2	-17.1	-17	-16.1
1422	2	2.2	2.4	2.2	-16.6	-16.5	-16.4	-15.6
1423	3.4	3.7	4	3.7	-15.7	-15.6	-15.5	-14.8
1424	4.1	4.5	4.9	4.5	-15.4	-15.3	-15.2	-14.6
1425	6.2	6.5	6.8	6.5	-14.8	-14.7	-14.6	-14.1
1426	8.3	8.4	8.5	8.4	-14.4	-14.3	-14.2	-13.7
1427	9.3	9.5	9.7	9.5	-13.5	-13.4	-13.3	-13.2
1428	10.5	10.6	10.7	10.6	-13.4	-13.3	-13.2	-13
1429	11.6	11.8	12	11.8	-12.5	-12.4	-12.3	-12
1430	12.6	12.9	13.2	12.9	-12.2	-12.1	-12	-11.6
1431	13.6	13.7	13.8	13.7	-11.2	-11.1	-11	-10.5
1432	14.1	14.3	14.5	14.3	-10.8	-10.7	-10.6	-10
1433	14.8	15.1	15.4	15.1	-10.6	-10.4	-10.2	-9.5
1434	15.5	15.9	16.3	15.9	-10.5	-10.4	-10.3	-9.5
1435	16.4	16.7	17	16.7	-9.4	-9.2	-9	-8.1
1436	16.6	16.7	16.8	16.7	-8.3	-8.2	-8.1	-7.1
1437	16.8	17	17.2	17	-7.5	-7.3	-7.1	-6
1438	17	17.1	17.2	17.1	-6.7	-6.6	-6.5	-6.4
1439	17.3	17.5	17.7	17.5	-6.4	-6.2	-6	-5.8
1440	18	18.3	18.6	18.3	-5	-4.7	-4.4	-4.1
1441	18.4	18.8	19.2	18.8	-3.8	-3.4	-3	-2.6
1442	18.9	19.2	19.5	19.2	-3.3	-2.9	-2.5	-2
1443	19.1	19.2	19.3	19.2	-2.1	-1.7	-1.3	-0.7
1444	19.2	19.4	19.6	19.4	-3.5	-3.1	-2.7	-2
1445	19.6	19.9	20.2	19.9	-1.9	-1.5	-1.1	-0.3
1446	20	20.1	20.2	20.1	-1	-0.6	-0.2	0.7
1447	19.9	20.1	20.3	20.1	0.1	0.5	0.9	1.9
1448	19.8	20.1	20.4	20.1	1	1.4	1.8	2.9
1449	20	20.4	20.8	20.4	2.4	2.8	3.2	4.2
1450	20.2	20.5	20.8	20.5	3	3.4	3.8	4.7
1451	20	20.1	20.2	20.1	4.1	4.5	4.9	5.7
1452	20.1	20.3	20.5	20.3	4.6	5	5.4	6.1
1453	20.7	20.8	20.9	20.8	6.7	7.1	7.5	8.1
1454	21.4	21.6	21.8	21.6	8.6	9	9.4	9.9
1455	21.7	22	22.3	22	9.9	10.3	10.7	11.2
1456	22	22.1	22.2	22.1	11.2	11.6	12	12.1
1457	22.1	22.3	22.5	22.3	12.3	12.7	13.1	13.3
1458	22.7	23	23.3	23	12.5	12.9	13.3	13.6
1459	23.2	23.6	24	23.6	12.7	13.1	13.5	13.9
1460	23.7	24	24.3	24	13	13.4	13.8	14.3
1461	23.3	23.4	23.5	23.4	13.8	14.2	14.6	15.2
1462	22.8	23	23.2	23	14.4	14.8	15.2	15.9
1463	22.6	22.7	22.8	22.7	14.6	15	15.4	16.2
1464	21.8	22	22.2	22	15	15.4	15.8	16.7
1465	21.3	21.6	21.9	21.6	15.6	15.9	16.2	17.2
1466	20.7	20.8	20.9	20.8	15.8	16.1	16.4	17.5
1467	21.2	21.4	21.6	21.4	16.2	16.5	16.8	16.9
1468	20.4	20.7	21	20.7	16.4	16.7	17	17.2
1469	20.5	20.9	21.3	20.9	17.6	17.9	18.2	18.5
1470	20.7	21	21.3	21	18.3	18.6	18.9	19.3
1471	20.2	20.3	20.4	20.3	18.8	19.1	19.4	19.9
1472	19.5	19.7	19.9	19.7	19.1	19.4	19.7	20.3
1473	19.1	19.2	19.3	19.2	19.5	19.8	20.1	20.8
1474	18.8	19	19.2	19	19.6	19.9	20.2	21
1475	18.6	18.9	19.2	18.9	19.9	20.2	20.5	21.4
1476	18.4	18.8	19.2	18.8	20	20.3	20.6	21.6
1477	17.9	18.2	18.5	18.2	20.1	20.4	20.7	21.8
1478	17.4	17.5	17.6	17.5	20	20.3	20.6	21.6
1479	17.3	17.5	17.7	17.5	20.4	20.7	21	21.9
1480	17	17.3	17.6	17.3	20.3	20.6	20.9	21.7
1481	17.3	17.4	17.5	17.4	20.3	20.6	20.9	21.6
1482	17.2	17.4	17.6	17.4	20.5	20.8	21.1	21.7
1483	16.8	17.1	17.4	17.1	21	21.3	21.6	22.1
1484	16.9	17.3	17.7	17.3	21.4	21.7	22	22.5
1485	16.6	16.9	17.2	16.9	21.9	22.2	22.5	23
1486	16	16.1	16.2	16.1	22.2	22.5	22.8	22.9
1487	16	16.2	16.4	16.2	22.5	22.8	23.1	23.3
1488	15.7	15.8	15.9	15.8	22.8	23.1	23.4	23.7
1489	14.9	15.1	15.3	15.1	23.2	23.5	23.8	24.2
1490	14.7	15	15.3	15	23.4	23.7	24	24.5
1491	14.4	14.5	14.6	14.5	23.4	23.7	24	24.6
1492	13.2	13.4	13.6	13.4	23.1	23.4	23.7	24.4
1493	13.7	14	14.3	14	23.3	23.6	23.9	24.7
1494	13.4	13.8	14.2	13.8	22.7	23	23.3	24.2
1495	13.1	13.4	13.7	13.4	22.6	22.9	23.2	24.2
1496	13.1	13.2	13.3	13.2	22.4	22.7	23	24.1
1497	12.1	12.3	12.5	12.3	23.7	24	24.3	24.4
1498	12.5	12.6	12.7	12.6	23.8	24.1	24.4	24.6
1499	11.9	12.1	12.3	12.1	24	24.3	24.6	24.9
1500	11.6	11.9	12.2	11.9	24.2	24.5	24.8	24.7
